# Supplementary material for: Time trends in peripheral artery disease incidence, prevalence and secondary preventive therapy: a cohort study in The Health Improvement Network in the UK
Source: PubMed Central journal article supplement — BMJ Open. 2018 Jan 21;8(1):e018184. doi: 10.1136/bmjopen-2017-018184 (PMC5780686; doi:10.1136/bmjopen-2017-018184), 2018-01-21
Supplement: bmjopen-2017-018184.draft_revisions.pdf [file bmjopen-2017-018184.draft_revisions.pdf]

# BMJ Open

BMJ Open is committed to open peer review. As part of this commitment we make the peer review history of every article we publish publicly available.

When an article is published we post the peer reviewers' comments and the authors' responses online. We also post the versions of the paper that were used during peer review. These are the versions that the peer review comments apply to.

The versions of the paper that follow are the versions that were submitted during the peer review process. They are not the versions of record or the final published versions. They should not be cited or distributed as the published version of this manuscript.

BMJ Open is an open access journal and the full, final, typeset and author-corrected version of record of the manuscript is available on our site with no access controls, subscription charges or pay-per-view fees (<http://bmjopen.bmj.com>).

If you have any questions on BMJ Open's open peer review process please email [editorial.bmjopen@bmj.com](mailto:editorial.bmjopen@bmj.com)

# BMJ Open

## Time trends in peripheral artery disease incidence, prevalence, and secondary preventive therapy: a cohort study in The Health Improvement Network in the UK

|                                 |                                                                                                                                                                                                                                                                                                                                                                                                     |
|---------------------------------|-----------------------------------------------------------------------------------------------------------------------------------------------------------------------------------------------------------------------------------------------------------------------------------------------------------------------------------------------------------------------------------------------------|
| Journal:                        | <i>BMJ Open</i>                                                                                                                                                                                                                                                                                                                                                                                     |
| Manuscript ID                   | bmjopen-2017-018184                                                                                                                                                                                                                                                                                                                                                                                 |
| Article Type:                   | Research                                                                                                                                                                                                                                                                                                                                                                                            |
| Date Submitted by the Author:   | 13-Jun-2017                                                                                                                                                                                                                                                                                                                                                                                         |
| Complete List of Authors:       | Cea-Soriano, Lucia; Spanish Center for Pharmacoepidemiology Research CEIFE, Fowkes, FGR; University of Edinburgh, Centre for Population Health Sciences<br>Johansson, Saga; AstraZeneca R&D, ; Gothenburg University, Institute of Medicine, Sahlgrenska Academy<br>Allum, Alaster; AstraZeneca R&D Cambridge<br>García Rodríguez, Luis; Spanish Centre for Pharmacoepidemiologic Research (CEIFE), |
| <b>Primary Subject Heading</b>: | Cardiovascular medicine                                                                                                                                                                                                                                                                                                                                                                             |
| Secondary Subject Heading:      | Cardiovascular medicine, Epidemiology, General practice / Family practice                                                                                                                                                                                                                                                                                                                           |
| Keywords:                       | EPIDEMIOLOGY, PRIMARY CARE, VASCULAR MEDICINE                                                                                                                                                                                                                                                                                                                                                       |
|                                 |                                                                                                                                                                                                                                                                                                                                                                                                     |

SCHOLARONE™  
Manuscripts

Only

1  
2  
3 **Time trends in peripheral artery disease incidence, prevalence,**  
4 **and secondary preventive therapy: a cohort study in The Health**  
5 **Improvement Network in the UK**  
6  
7  
8  
9

10  
11 Lucía Cea Soriano,<sup>1,2</sup> F Gerry R Fowkes,<sup>3</sup> Saga Johansson,<sup>4</sup> Alaster M Allum<sup>5</sup> and Luis A  
12 García Rodríguez<sup>1</sup>  
13

14  
15  
16  
17 <sup>1</sup>Pharmacoepidemiology, Spanish Centre for Pharmacoepidemiologic Research (CEIFE),  
18 Madrid, Spain  
19

20 <sup>2</sup>Department of Preventive Medicine and Public Health, Faculty of Medicine, Complutense  
21 University of Madrid, Madrid, Spain  
22

23 <sup>3</sup>Centre for Population Health Sciences, University of Edinburgh, Edinburgh, UK  
24

25 <sup>4</sup>AstraZeneca Gothenburg, Mölndal, Sweden  
26

27 <sup>5</sup>AstraZeneca Cambridge, Cambridge, UK  
28  
29

30 **Target journal:** *BMJ Open*  
31

32  
33 **Correspondence to:** Dr Lucía Cea Soriano, Centro Español de Investigación  
34 Farmacoepidemiológica (CEIFE), c/ Almirante 28-2º, Madrid 28004, Spain.

35  
36  
37 E-mail: [luciaceife@gmail.com](mailto:luciaceife@gmail.com); phone: +34 (91) 531 3404; fax: +34 (91) 531 2871.  
38  
39  
40  
41  
42  
43  
44  
45  
46  
47  
48  
49  
50  
51  
52  
53  
54  
55  
56  
57  
58  
59  
60

## ABSTRACT

**Objectives:** To assess time trends in symptomatic peripheral artery disease (PAD) incidence and prevalence, and secondary preventive therapy.

**Design:** Cohort study using The Health Improvement Network (THIN).

**Setting:** UK primary care.

**Participants:** Individuals aged 50–89 years, annually between 2000 and 2014. Participants with symptomatic PAD were identified using Read codes.

**Outcome measures:** Incidence and prevalence of symptomatic PAD from 2000 to 2014, overall and by sex and age. Proportion of patients prescribed secondary preventive therapy with acetylsalicylic acid (ASA), clopidogrel, an angiotensin-converting enzyme (ACE) inhibitor, an angiotensin-receptor blocker (ARB), and/or a statin.

**Results:** The incidence of symptomatic PAD per 10 000 person-years decreased over time, from 38.6 (men: 51.0; women: 28.7) in 2000 to 17.3 (men: 23.1; women: 12.4) in 2014. The prevalence of symptomatic PAD decreased from 3.4% (men: 4.5%; women: 2.5%) in 2000 to 2.4% (men: 3.1%; women: 1.7%) in 2014. Incidence and prevalence decreases were observed in all age groups. The proportions of patients prescribed ASA monotherapy, clopidogrel monotherapy, and dual antiplatelet therapy in the 2 months after PAD diagnosis were 42.7%, 2.9%, and 2.5%, respectively, during 2000–2003, and 44.7%, 11.0%, and 5.2%, respectively, during 2012–2014. For ACE inhibitor/ARB therapy and statins, proportions in the 2 months after diagnosis were 30.2% and 31.2%, respectively, during 2000–2003, and 45.1% and 65.9%, respectively, during 2012–2014.

**Conclusion:** The incidence and prevalence of symptomatic PAD diagnosed in UK primary care are decreasing. A large proportion of the population with PAD in clinical practice does not receive guideline-recommended secondary prevention therapy.

Word count: 254 (limit 300)

**Strengths and limitations of this study**

- This is, to our knowledge, the largest study to date of time trends in PAD incidence and prevalence in the UK.
- Data are from electronic medical records in THIN, which has demonstrated validity for use in pharmacoepidemiological studies.
- Patients' anonymised medical records were reviewed manually to validate the selected diagnostic Read codes used to identify symptomatic PAD in a random sample.
- Potential limitations include possible changes over time in the source population and in how PAD is diagnosed in UK primary care, which would have affected the secular incidence and prevalence trend patterns.

**What this paper adds***What is already known on this subject*

– Whereas rates of myocardial infarction and ischaemic stroke are declining in most countries, secular incidence and prevalence trends for peripheral artery disease (PAD) are less clear.

– An increase in the prevalence of PAD from 2000 to 2010 was reported in a recent meta-analysis of data from 10 high-income countries including from the USA and four European countries, but not the UK.

– Age-standardised PAD prevalence data from the USA show only minimal changes from 1990 to 2010.

*What this study adds*

– The results of this large observational study, conducted in ‘real-life’ clinical practice, showed a steady decline over time in the incidence and prevalence of symptomatic PAD in UK primary care from 2000 to 2014.

## INTRODUCTION

Peripheral artery disease (PAD) causes leg pain or discomfort, most commonly occurring on exertion and resolving after rest (intermittent claudication), although some individuals have no obvious symptoms even when functional impairment is noticeable on testing.<sup>1</sup> Individuals with PAD are at increased risk of myocardial infarction (MI), ischaemic stroke, and death.<sup>2,3</sup> To reduce the risk of cardiovascular (CV) events, US and European guidelines recommend antiplatelet therapy and statins for all individuals with symptomatic PAD, and antihypertensive therapy for those with concomitant hypertension.<sup>4-7</sup> Angiotensin-converting enzyme (ACE) inhibitors may also reduce CV risk in symptomatic patients with PAD.<sup>4-7</sup>

The key risk factors for PAD are similar to those for other CV diseases, and include smoking, increasing age, diabetes mellitus, hypertension, and dyslipidaemia.<sup>8,9</sup> In recent years, the prevalence patterns of PAD risk factors have been changing substantially. Smoking prevalence is decreasing, but there is an increase in the prevalence of diabetes mellitus. Advances in treatment and in the implementation of processes of care have resulted in individuals with coronary heart disease and cerebrovascular disease now surviving to older ages, which is when PAD tends to manifest itself.

Whereas rates of MI and ischaemic stroke are declining in most countries,<sup>10-12</sup> secular incidence and prevalence trends for PAD are less clear. A recent meta-analysis reported an increase in the prevalence of PAD (assessed using the ankle-brachial index [ABI]) in high-income countries from 2000 to 2010.<sup>9</sup> The analysis included data from 10 high-income countries including the USA and four European countries, but not the UK. Age-standardised prevalence data for symptomatic PAD from the US State of Health report show only minimal changes (<0.2%) from 1990 to 2010.<sup>13</sup> The aim of the current study was to determine secular trends in the incidence and prevalence of symptomatic PAD and of secondary preventive therapy in a large, representative primary care population in the UK.

## METHODS

### Study design and data source

This was a retrospective observational cohort study. Data were collected from The Health Improvement Network (THIN) database in the UK. THIN is an electronic medical research database that contains fully anonymised data on approximately 11 million patients collected from participating primary care practices in the UK.<sup>14</sup> The data in THIN are from all patients in participating practices and are recorded during each consultation with the primary care

1  
2  
3 physician/nurse, leaving no scope for selective participation or reporting. Patients included in  
4 THIN are representative of the UK general population.<sup>14</sup> The Read classification is used to  
5 code specific diagnoses,<sup>15</sup> and a drug dictionary based on data from the Gemscript  
6 classification is used to code drugs.<sup>16</sup>  
7  
8  
9

## 10 11 **Study cohorts**

### 12 *Source population*

13  
14 Patients aged 50–89 years were identified in THIN, annually between 1 January 2000 and  
15 31 December 2014. To be eligible for entry into the study, patients had to have been enrolled  
16 with their primary care physician for at least 2 years, to have visited their primary care  
17 physician at least once during that time, and to have a computerised prescription history for at  
18 least 2 years before study entry. These inclusion criteria helped to ensure that study  
19 participants were making use of healthcare services offered by their primary care practice and  
20 had historical information available.  
21  
22  
23  
24  
25  
26  
27

### 28 *Incident and prevalent symptomatic PAD*

29  
30 For each year during the follow up period, individuals with evidence of symptomatic PAD  
31 were identified by an automated database search using Read codes indicative of a  
32 symptomatic PAD diagnosis and/or related surgical procedures (supplementary table S1). For  
33 PAD incidence and secular trends, the date of the first entry of a PAD diagnosis in the THIN  
34 database was set as the index date. For prevalent PAD, each patient's start date was set as the  
35 date on which the study inclusion criteria (as listed above) were met.  
36  
37  
38  
39

40 The positive predictive value of the automated database search to identify patients  
41 with symptomatic PAD was assessed in a random validation sample of 400 of the identified  
42 patients. Patients' anonymised medical records, which included free-text comments from the  
43 primary care physicians, were reviewed manually. The diagnosis was confirmed in 97.0% of  
44 individuals (194/200) with incident PAD and in 99.0% of patients (198/200) with prevalent  
45 PAD, thereby confirming the positive predictive validity of the selected diagnostic Read  
46 codes used to identify symptomatic PAD.  
47  
48  
49  
50  
51  
52  
53  
54  
55  
56  
57  
58  
59  
60



## Statistical analyses

Annual incidence and prevalence were determined for the years 2000–2014. The annual incidence was calculated by dividing the number of individuals with newly diagnosed PAD in a particular year by the contribution of all study participants at risk (free of PAD) in that year. To calculate the annual prevalence, the sum of the number of individuals with a history of PAD plus the number of individuals with newly diagnosed PAD in a particular year was divided by the total population meeting the study eligibility criteria. The time trends in the proportions of patients prescribed therapy with acetylsalicylic acid (ASA), clopidogrel, an ACE inhibitor, an angiotensin-receptor blocker (ARB), and/or a statin in the 12 months before and 12 months after an incident PAD diagnosis were also assessed.

## Results

### Time trends in incidence and prevalence

Time trends in the incidence and prevalence of PAD from 2000 to 2014, overall and separately by sex and age group, are shown in figure 1. The incidence of PAD decreased steadily over time, from 38.55 per 10 000 person-years in 2000 to 17.33 per 10 000 person-years in 2014 (figure 1a). The incidence was higher in men than in women: in 2000 it was 50.96 per 10 000 person-years in men and 28.70 per 10 000 person-years in women, and in 2014 it was 23.05 per 10 000 person-years and 12.37 per 10 000 person-years, respectively. Decreases in incidence over time were observed in all age groups (figure 1b).

The incidence of PAD was higher in patients with a history of ischaemic heart disease at the study start date than in those with no such history (supplementary table S2). The incidence of PAD decreased over time at a similar rate in patients with a history of ischaemic heart disease (from 93.5 per 10 000 person-years in 2000 to 43.5 per 10 000 person-years in 2014) and those without a history of ischaemic heart disease (from 30.7 per 10 000 person-years in 2000 to 14.5 per 10 000 person-years in 2014).

The overall decrease in incidence of PAD from 2000 to 2014 was paralleled by a decrease in prevalence of the disease (figure 1c). The prevalence of PAD decreased from 3.42% (men: 4.53%; women: 2.52%) in 2000 to 2.37% (men: 3.12%; women: 1.70%) in 2014. Decreases in prevalence over time were observed in all age groups (figure 1d).

### Time trends in demographics and comorbidities

Noticeable changes over time among patients with incident PAD diagnosed in 2000, 2005, 2010, or 2014 included increases in the proportions of patients who were obese (body mass index  $\geq 30$  kg/m<sup>2</sup>), patients who were former smokers (paralleled by a decrease in those who never smoked, with the proportion of current smokers remaining relatively constant), and individuals who had prescriptions for five or more medications (supplementary table S3). Regarding comorbidity patterns, ischaemic heart disease prevalence without MI declined over time, with rates of 34.0%, 32.8%, 29.5%, and 26.4% in the years 2000, 2005, 2010, and 2014, respectively. However, increases in prevalence over time were observed for diagnoses of diabetes mellitus, chronic obstructive pulmonary disease, asthma, cancer, depression, and dementia. The age and sex distributions were similar over time.

### Time trends in treatment patterns

Time trends in treatment patterns in the 12 months before and 12 months after an incident diagnosis of PAD are shown in figure 2. Prescription rates increased at the time of the incident PAD diagnosis. ASA monotherapy was the most commonly prescribed antiplatelet therapy during the study period. Prescription rates for antiplatelet therapy in the 2 months after diagnosis in the years 2000–2003, 2004–2007, 2008–2011, and 2012–2014 were 42.7%, 47.4%, 48.4%, and 44.7% for ASA, 2.9%, 4.6%, 4.7%, and 11.0% for clopidogrel, and 2.5%, 3.2%, 4.6%, and 5.2% for dual antiplatelet therapy, respectively.

For ACE inhibitor or ARB therapy, prescription rates in the 2 months after diagnosis in the years 2000–2003, 2004–2007, 2008–2011, and 2012–2014 were 30.2%, 41.9%, 46.5%, and 45.1%, and for statin therapy they were 31.2%, 56.5%, 63.6%, and 65.9%, respectively. The proportion of patients with a prescription for an ACE inhibitor or ARB remained relatively similar before PAD diagnosis compared with after diagnosis in the earlier three study periods, but decreased after diagnosis in the most recent (2012–2014) study period. The proportion of patients with a statin prescription increased after an incident PAD diagnosis. In the most recent study period it decreased again in the months after the diagnosis, although this trend was less pronounced when the analysis was restricted to practices with at least 1 year of data collection after the start date in the 2012–2014 subgroup (supplementary figure S1), suggesting differences between practices in their end of year data collection rather than an actual decline in statin prescriptions.

Although the proportion of patients with prescriptions for all three therapies (an antiplatelet agent, plus an ACE inhibitor or ARB, plus a statin) in the 12 months before and

1  
2  
3 12 months after an incident diagnosis increased after 2000–2003 and also rose at PAD  
4 diagnosis, it remained below 30% at all times. Prescription rates for the three therapies  
5 combined in the 2 months after diagnosis in the years 2000–2003, 2004–2007, 2008–2011,  
6 and 2012–2014 were 9.7%, 22.6%, 27.3%, and 27.6%, respectively.  
7  
8  
9

## 10 11 12 **DISCUSSION**

13  
14 The results of this large observational study, conducted in ‘real-life’ clinical practice, showed  
15 a steady decline over time in the incidence and prevalence of symptomatic PAD in UK  
16 primary care. The incidence in patients with ischaemic heart disease was approximately three  
17 times higher than in those without ischaemic heart disease, but both groups showed similar  
18 rates of decline. Ischaemic heart disease prevalence declined over time, potentially  
19 underlying the parallel secular trend in PAD prevalence, and suggesting general  
20 improvements in overall CV health over time in the UK.  
21  
22

23  
24 Results of a recent meta-analysis indicated that the prevalence of PAD increased from  
25 2000 to 2010 in high-income countries.<sup>9</sup> Data on temporal trends in PAD prevalence suggest  
26 that any observed prevalence increases over time may be due to an ageing population, with  
27 age-standardised prevalence data for symptomatic PAD reporting only minimal changes over  
28 time.<sup>13</sup>  
29  
30

31  
32 The current study, which included only patients aged 50 years or older, observed a  
33 symptomatic PAD prevalence that ranged from 3.42% in 2000 to 2.37% in 2014. These rates  
34 are similar to those reported in other population-based studies in the USA and Europe that  
35 include a minimum age cut-off. In both the US Life Line Screening programme (participants  
36 aged  $\geq 40$  years; study years 2003–2008)<sup>17</sup> and the Spanish HERMEX study (participants  
37 aged  $\geq 50$  years; study years: 2007–2009),<sup>18</sup> PAD prevalence was 3.7%. Slightly higher  
38 prevalences of 7.6% and 5.8%, respectively, were reported in a Spanish primary healthcare  
39 study (participants aged  $\geq 50$  years; study years 2006–2008)<sup>19</sup> and the German Heinz Nixdorf  
40 Recall study (participants aged  $\geq 45$  years; study years 2000–2003).<sup>20</sup>  
41  
42  
43  
44  
45  
46  
47

48  
49 There is a paucity of published data regarding the incidence of PAD.<sup>8</sup> Long-term  
50 results from a German study conducted in primary care (the ‘getABI’ study), which enrolled  
51 patients aged 65 years and older, found a PAD incidence of 203 per 10 000 person-years. In  
52 our study, a lower PAD incidence than in the German study was observed in the older age  
53 groups, ranging from approximately 30 per 10 000 person-years to 70 per 10 000 person-  
54 years (figure 1).  
55  
56  
57  
58  
59  
60

1  
2  
3 The reported incidence and prevalence across studies will depend on whether they are  
4 obtained using recorded diagnoses, as in the current study, or by assessing all study patients  
5 for PAD symptoms and signs (e.g. via the ABI). The latter approach will tend to result in  
6 higher observed incidence and prevalence. When assessing secular trends, it is essential to  
7 ensure that the methodology for identifying patients with PAD is similar across all time  
8 points, as was the case in the current study.  
9

10  
11  
12  
13 Guidelines on the management of PAD were first published by the European Society  
14 of Cardiology (ESC) in August 2011<sup>5</sup> and by the UK National Institute of Health and Care  
15 Excellence (NICE) in August 2012.<sup>21</sup> Both recommend antiplatelet therapy in all individuals  
16 with symptomatic PAD. Antiplatelet therapy for the prevention of vascular events has also  
17 been included in the NICE PAD management pathway. Additional recommendations from  
18 the ESC and NICE include smoking cessation, and management of diabetes mellitus,  
19 hypertension, and hyperlipidaemia.  
20

21  
22  
23  
24 Although the proportion of patients with PAD prescribed antiplatelet therapy  
25 increased over time in the current study, more than one-third of patients were not prescribed  
26 antiplatelet therapy with ASA, clopidogrel, or combination therapy following an incident  
27 PAD diagnosis between 2012 and 2014. The proportion of patients with incident PAD who  
28 were prescribed a statin increased to approximately 66% at the time of PAD diagnosis during  
29 2012–2014. The proportion prescribed an ACE inhibitor or ARB decreased slightly after  
30 diagnosis in 2012–2014. Prescribing for secondary preventive therapies tended to be highest  
31 following PAD diagnosis.  
32

33  
34  
35  
36  
37  
38 Our study has several key strengths. It is, to our knowledge, the largest study to date  
39 of time trends in PAD incidence and prevalence in the UK. Data are from electronic medical  
40 records in THIN. Patients included in THIN are representative of the UK general population  
41 in terms of age, sex, and geographical location.<sup>14</sup> THIN has demonstrated validity for use in  
42 pharmacoepidemiological studies.<sup>22</sup> Patients' anonymised medical records, which included  
43 free-text comments from the primary care physicians, were reviewed manually to validate the  
44 selected diagnostic Read codes used to identify symptomatic PAD in a random sample.  
45  
46 Potential limitations include possible changes over time in the source population and in how  
47 PAD is diagnosed in UK primary care, which would have affected the secular incidence and  
48 prevalence trend patterns.  
49

50  
51  
52  
53  
54  
55 In conclusion, results from this study suggest that the incidence and prevalence of  
56 symptomatic PAD are decreasing in the UK. Although prescription rates have increased over  
57  
58  
59  
60

1  
2  
3 time, a large proportion of individuals with PAD in clinical practice do not receive guideline-  
4 recommended secondary prevention therapy.  
5  
6

### 7 8 **Funding**

9 This work was supported by AstraZeneca. Medical writing support was provided by Dr Anja  
10 Becher of Oxford PharmaGenesis, Oxford, UK, and was funded by AstraZeneca.  
11  
12

### 13 14 **Competing interests**

15 All authors have completed the ICMJE uniform disclosure form at  
16 www.icmje.org/coi\_disclosure.pdf and declare the following. L Cea Soriano and LA García  
17 Rodríguez are employees of CEIFE, which has received research funding from AstraZeneca  
18 Gothenburg, Mölndal, Sweden and Bayer Pharma AG, Berlin, Germany; LA García  
19 Rodríguez has also received honoraria for serving on scientific advisory boards for  
20 AstraZeneca and Bayer. FGR Fowkes has received honoraria for serving on scientific  
21 advisory boards for AstraZeneca, Bayer, and Merck. S Johansson is an employee of  
22 AstraZeneca Gothenburg, Mölndal, Sweden. AM Allum is an employee of AstraZeneca  
23 Cambridge, Cambridge, UK.  
24  
25  
26  
27  
28  
29  
30  
31  
32

### 33 **Data sharing statement**

34 All relevant source data are shown in the manuscript and supplementary files.  
35  
36

### 37 **Exclusive licence**

38 I, L. Cea Soriano, the corresponding author of this article contained within the original  
39 manuscript which includes any diagrams and photographs within and any related or stand  
40 alone film submitted (the “Contribution”) has the right to grant on behalf of all authors and  
41 does grant on behalf of all authors, a licence to the BMJ Publishing Group Ltd and its  
42 licencees, to permit this Contribution (if accepted) to be published in the BMJ and any other  
43 BMJ Group products and to exploit all subsidiary rights, as set out in our licence set out at:  
44 [http://www.bmj.com/about-bmj/resources-authors/forms-policies-and-checklists/copyright-](http://www.bmj.com/about-bmj/resources-authors/forms-policies-and-checklists/copyright-open-access-and-permission-reuse)  
45 [open-access-and-permission-reuse.](http://www.bmj.com/about-bmj/resources-authors/forms-policies-and-checklists/copyright-open-access-and-permission-reuse)  
46  
47  
48  
49  
50  
51  
52

### 53 **Author contributions**

54  
55  
56  
57  
58  
59  
60

1  
2  
3 Lucía Cea Soriano: conception and design of the work, data collection, data analysis, data  
4 interpretation, critical revision of the article, approval of final draft. F Gerry R Fowkes: data  
5 interpretation, critical revision of the article, approval of final draft. Saga Johansson:  
6  
7 conception and design of the work, data interpretation, critical revision of the article,  
8  
9 approval of final draft. Alaster M Allum: conception and design of the work, data  
10 interpretation, critical revision of the article, approval of final draft. Luis A García Rodríguez:  
11  
12 conception and design of the work, data collection, data analysis, data interpretation, critical  
13  
14 revision of the article, approval of final draft.  
15  
16  
17  
18  
19  
20  
21  
22  
23  
24  
25  
26  
27  
28  
29  
30  
31  
32  
33  
34  
35  
36  
37  
38  
39  
40  
41  
42  
43  
44  
45  
46  
47  
48  
49  
50  
51  
52  
53  
54  
55  
56  
57  
58  
59  
60

**REFERENCES**

1. Olin JW, Sealove BA. Peripheral artery disease: current insight into the disease and its diagnosis and management. *Mayo Clin Proc* 2010;85:678–92.
2. Pande RL, Perlstein TS, Beckman JA, Creager MA. Secondary prevention and mortality in peripheral artery disease: National Health and Nutrition Examination Study, 1999 to 2004. *Circulation* 2011;124:17–23.
3. Patel MR, Becker RC, Wojdyla DM, et al. Cardiovascular events in acute coronary syndrome patients with peripheral arterial disease treated with ticagrelor compared with clopidogrel: data from the PLATO Trial. *Eur J Prev Cardiol* 2015;22:734–42.
4. Anderson JL, Halperin JL, Albert NM, et al. Management of patients with peripheral artery disease (compilation of 2005 and 2011 ACCF/AHA guideline recommendations): a report of the American College of Cardiology Foundation/American Heart Association Task Force on Practice Guidelines. *Circulation* 2013;127:1425–43.
5. Tendera M, Aboyans V, Bartelink ML, et al. ESC guidelines on the diagnosis and treatment of peripheral artery diseases: document covering atherosclerotic disease of extracranial carotid and vertebral, mesenteric, renal, upper and lower extremity arteries: the Task Force on the Diagnosis and Treatment of Peripheral Artery Diseases of the European Society of Cardiology (ESC). *Eur Heart J* 2011;32:2851–906.
6. Norgren L, Hiatt WR, Dormandy JA, Nehler MR, Harris KA, Fowkes FG. Inter-society consensus for the management of peripheral arterial disease (TASC II). *J Vasc Surg* 2007;45 Suppl S:S5–67.
7. Rooke TW, Hirsch AT, Misra S, et al. 2011 ACCF/AHA focused update of the guideline for the management of patients with peripheral artery disease (updating the 2005 guideline): a report of the American College of Cardiology Foundation/American Heart Association Task Force on Practice Guidelines. *J Am Coll Cardiol* 2011;58:2020–45.
8. Criqui MH, Aboyans V. Epidemiology of peripheral artery disease. *Circ Res* 2015;116:1509–26.
9. Fowkes FG, Rudan D, Rudan I, et al. Comparison of global estimates of prevalence and risk factors for peripheral artery disease in 2000 and 2010: a systematic review and analysis. *Lancet* 2013;382:1329–40.

10. Mozaffarian D, Benjamin EJ, Go AS, et al. Heart disease and stroke statistics – 2015 update: a report from the American Heart Association. *Circulation* 2015;131:e29–322.
11. Moran AE, Forouzanfar MH, Roth GA, et al. The global burden of ischemic heart disease in 1990 and 2010: the Global Burden of Disease 2010 study. *Circulation* 2014;129:1493–501.
12. Nichols M, Townsend N, Scarborough P, Rayner M. Cardiovascular disease in Europe 2014: epidemiological update. *Eur Heart J* 2014;35:2929.
13. Murray CJ, Atkinson C, Bhalla K, et al. The state of US health, 1990–2010: burden of diseases, injuries, and risk factors. *Jama* 2013;310:591–608.
14. Bourke A, Dattani H, Robinson M. Feasibility study and methodology to create a quality-evaluated database of primary care data. *Inform Prim Care* 2004;12:171–7.
15. Stuart-Buttle CD, Read JD, Sanderson HF, Sutton YM. A language of health in action: Read Codes, classifications and groupings. *Proc AMIA Annu Fall Symp* 1996:75–9.
16. In Practice Systems Ltd. Gemscript (<http://www.inps.co.uk/>).
17. Savji N, Rockman CB, Skolnick AH, et al. Association between advanced age and vascular disease in different arterial territories: a population database of over 3.6 million subjects. *J Am Coll Cardiol* 2013;61:1736–43.
18. Felix-Redondo FJ, Fernandez-Berges D, Grau M, Baena-Diez JM, Mostaza JM, Vila J. Prevalence and clinical characteristics of peripheral arterial disease in the study population Hermex. *Rev Esp Cardiol* 2012;65:726–33.
19. Alzamora MT, Fores R, Baena-Diez JM, et al. The peripheral arterial disease study (PERART/ARTPER): prevalence and risk factors in the general population. *BMC Public Health* 2010;10:38.
20. Kroger K, Stang A, Kondratieva J, et al. Prevalence of peripheral arterial disease – results of the Heinz Nixdorf recall study. *Eur J Epidemiol* 2006;21:279–85.
21. National Institute for Health and Care Excellence (NICE). Peripheral arterial disease: diagnosis and management (CG147). 2012.  
<https://www.nice.org.uk/guidance/cg147/resources/peripheral-arterial-disease-diagnosis-and-management-35109575873989>.
22. Lewis JD, Schinnar R, Bilker WB, Wang X, Strom BL. Validation studies of The Health Improvement Network (THIN) database for pharmacoepidemiology research. *Pharmacoepidemiol Drug Saf* 2007;16:393–401.



## Figure legends

**Figure 1** Trends from 2000 to 2014 in peripheral artery disease: a) incidence, overall and according to sex; b) incidence according to age group; c) prevalence, overall and according to sex; d) prevalence according to age group.

**Figure 2** Time trends in the proportions of patients prescribed a) acetylsalicylic acid monotherapy, b) clopidogrel monotherapy, c) dual antiplatelet therapy, d) an angiotensin-converting enzyme inhibitor or an angiotensin-receptor blocker, e) a statin, or f) combined therapy with an antiplatelet, plus an angiotensin-converting enzyme inhibitor or an angiotensin-receptor blocker, plus a statin in the 12 months before and 12 months after an incident diagnosis of PAD.

Shaded area highlights the 2 months before and 2 months after the PAD diagnosis.

PAD, peripheral artery disease.

**Supplementary Figure S1** Time trends in the proportions of patients prescribed statin therapy in the 12 months before and 12 months after an incident diagnosis of PAD, with data for 2012–2014 restricted to primary care practices with at least 1 year of follow-up from the start date

Shaded area highlights the 2 months before and after the PAD diagnosis.

PAD, peripheral artery disease.

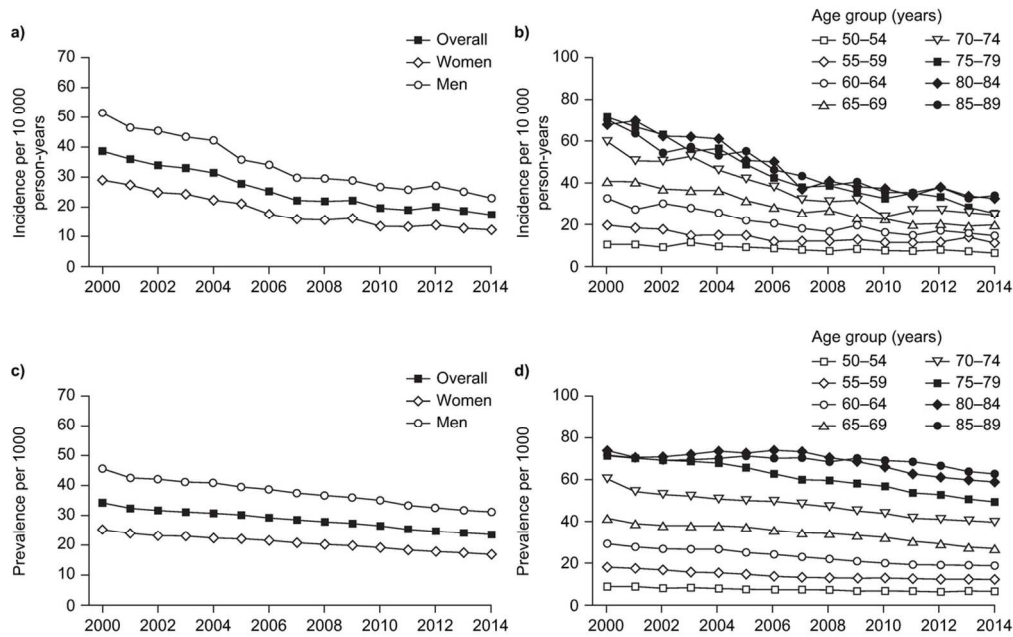

Figure 1 Trends from 2000 to 2014 in peripheral artery disease: a) incidence, overall and according to sex; b) incidence according to age group; c) prevalence, overall and according to sex; d) prevalence according to age group.

109x68mm (300 x 300 DPI)

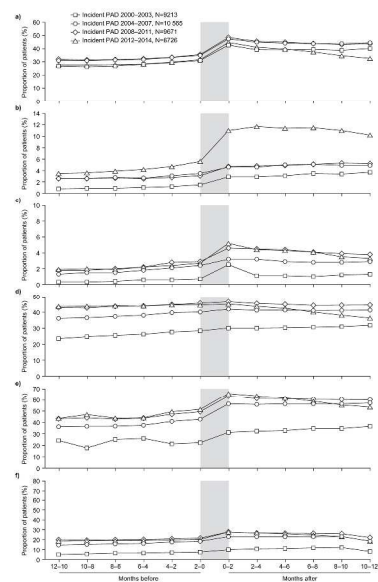

Figure 2 Time trends in the proportions of patients prescribed a) acetylsalicylic acid monotherapy, b) clopidogrel monotherapy, c) dual antiplatelet therapy, d) an angiotensin-converting enzyme inhibitor or an angiotensin-receptor blocker, e) a statin, or f) combined therapy with an antiplatelet, plus an angiotensin-converting enzyme inhibitor or an angiotensin-receptor blocker, plus a statin in the 12 months before and 12 months after an incident diagnosis of PAD.

Shaded area highlights the 2 months before and 2 months after the PAD diagnosis.  
PAD, peripheral artery disease.

355x279mm (300 x 300 DPI)

# Time trends in peripheral artery disease incidence, prevalence, and secondary preventive therapy: a cohort study in The Health Improvement Network in the UK

Lucía Cea Soriano et al.

## Supplementary materials

**Supplementary Table S1** Read codes indicative of a symptomatic PAD diagnosis and/or related surgical procedures

| Read code | Descriptor                                      |
|-----------|-------------------------------------------------|
| G700.11   | Aorto-iliac disease                             |
| G702.00   | Extremity artery atheroma                       |
| G702z00   | Extremity artery atheroma NOS                   |
| G73..11   | Peripheral ischaemic vascular disease           |
| G73..12   | Ischaemia of legs                               |
| G73..13   | Peripheral ischaemia                            |
| G730100   | Raynaud's phenomenon                            |
| G731000   | Buerger's disease                               |
| G731100   | Presenile gangrene                              |
| G732.00   | Peripheral gangrene                             |
| G732000   | Gangrene of toe                                 |
| G732100   | Gangrene of foot                                |
| G733.00   | Ischaemic foot                                  |
| G734.00   | Peripheral arterial disease                     |
| G73y.00   | Other specified peripheral vascular disease     |
| G73y000   | Diabetic peripheral angiopathy                  |
| G73y100   | Peripheral angiopathic disease EC NOS           |
| G73yz00   | Other specified peripheral vascular disease NOS |
| G73z.00   | Peripheral vascular disease NOS                 |
| G73z000   | Intermittent claudication                       |
| G73z011   | Claudication                                    |
| G73z012   | Vascular claudication                           |

1  
2  
3  
4  
5  
6  
7  
8  
9  
10  
11  
12  
13  
14  
15  
16  
17  
18  
19  
20  
21  
22  
23  
24  
25  
26  
27  
28  
29  
30  
31  
32  
33  
34  
35  
36  
37  
38  
39  
40  
41  
42  
43  
44  
45  
46  
47  
48  
49  
50  
51  
52  
53  
54  
55  
56  
57  
58  
59  
60

|         |                                                          |
|---------|----------------------------------------------------------|
| G73z100 | Spasm of peripheral artery                               |
| G73zz00 | Peripheral vascular disease NOS                          |
| G74..00 | Arterial embolism and thrombosis                         |
| G74..11 | Arterial embolus and thrombosis                          |
| G74..12 | Thrombosis – arterial                                    |
| G74..13 | Arterial embolic and thrombotic occlusion                |
| G740.12 | Aortoiliac obstruction                                   |
| G740.13 | Leriche's syndrome                                       |
| G742400 | Embolism and thrombosis of the femoral artery            |
| G742500 | Embolism and thrombosis of the popliteal artery          |
| G742600 | Embolism and thrombosis of the anterior tibial artery    |
| G742700 | Embolism and thrombosis of the dorsalis pedis artery     |
| G742800 | Embolism and thrombosis of the posterior tibial artery   |
| G742900 | Embolism and thrombosis of a leg artery NOS              |
| G742B00 | Post radiological embolism of lower limb artery          |
| G742z00 | Peripheral arterial embolism and thrombosis NOS          |
| G74y000 | Embolism and/or thrombosis of the common iliac artery    |
| G74y100 | Embolism and/or thrombosis of the internal iliac artery  |
| G74y200 | Embolism and/or thrombosis of the external iliac artery  |
| G74y300 | Embolism and thrombosis of the iliac artery unspecified  |
| G74z.00 | Arterial embolism and thrombosis NOS                     |
| G761.00 | Stricture of artery                                      |
| G765.00 | Necrosis of artery                                       |
| G76A.00 | Arterial insufficiency                                   |
| G76z.00 | Disorders of arteries and arterioles NOS                 |
| G76z000 | Iliac artery occlusion                                   |
| G76z100 | Femoral artery occlusion                                 |
| G76z200 | Popliteal artery occlusion                               |
| G7y..00 | Other specified arterial, arteriole or capillary disease |
| G7z..00 | Arterial, arteriole and capillary diseases NOS           |
| 14NB.00 | H/O: Peripheral vascular disease procedure               |
| 2I16.00 | O/E - gangrene                                           |
| R054.00 | [D]Gangrene                                              |

1  
2  
3 R054200 [D]Gangrene of toe in diabetic  
4 R054300 [D]Widespread diabetic foot gangrene  
5  
6 8HIP.00 Referred for peripheral artery disease assessment  
7

8 D, diagnosis; EC, elsewhere classified; H/O, history of; O/E, on examination; NOS, not  
9 otherwise specified; PAD, peripheral artery disease.  
10  
11  
12  
13  
14  
15  
16  
17  
18  
19  
20  
21  
22  
23  
24  
25  
26  
27  
28  
29  
30  
31  
32  
33  
34  
35  
36  
37  
38  
39  
40  
41  
42  
43  
44  
45  
46  
47  
48  
49  
50  
51  
52  
53  
54  
55  
56  
57  
58  
59  
60

For peer review only

**Supplementary Table S2** Trends from 2000 to 2014 in peripheral artery disease incidence, overall and according to history of IHD at baseline

| Year                | Overall          | IHD               | No IHD           |
|---------------------|------------------|-------------------|------------------|
| <b>2000</b>         |                  |                   |                  |
| Population, n       | 540 918          | 67 713            | 473 205          |
| Cases, n            | 1891             | 575               | 1316             |
| Person-years        | 490 553          | 61 463            | 429 089          |
| Incidence (95% CI)* | 38.5 (36.8–40.3) | 93.5 (86.2–101.5) | 30.7 (29.0–32.4) |
| <b>2005</b>         |                  |                   |                  |
| Population, n       | 1 008 929        | 121 781           | 887 148          |
| Cases, n            | 2635             | 789               | 1846             |
| Person-years        | 949 911          | 114 885           | 835 026          |
| Incidence (95% CI)* | 27.7 (26.7–28.8) | 68.7 (64.0–73.6)  | 22.1(21.1–23.1)  |
| <b>2010</b>         |                  |                   |                  |
| Population, n       | 1 219 901        | 132 092           | 1 087 809        |
| Cases, n            | 2211             | 592               | 1619             |
| Person-years        | 1 135 809        | 122 635           | 1 013 174        |
| Incidence (95% CI)* | 19.5 (18.7–20.3) | 48.3 (44.5–52.3)  | 16.0 (15.2–16.8) |
| <b>2014</b>         |                  |                   |                  |
| Population, n       | 1 306 192        | 126 031           | 1 180 161        |
| Cases, n            | 2050             | 499               | 1551             |
| Person-years        | 1 182 588        | 114 760           | 1 067 828        |
| Incidence (95% CI)* | 17.3 (16.7–18.1) | 43.5 (39.8–47.5)  | 14.5 (13.8–15.3) |

\*Incidence per 10 000 person–years.

CI, confidence interval; IHD, ischaemic heart disease.

**Supplementary Table S3** Characteristics of patients with incident peripheral artery disease diagnosed in the years 2000, 2005, 2010, and 2014

| <b>Characteristic</b>                      | <b>Year 2000</b> | <b>Year 2005</b> | <b>Year 2010</b> | <b>Year 2014</b> |
|--------------------------------------------|------------------|------------------|------------------|------------------|
|                                            | <b>(n=1891)</b>  | <b>(n=2635)</b>  | <b>(n=2211)</b>  | <b>(n=2050)</b>  |
|                                            | <b>n (%)</b>     | <b>n (%)</b>     | <b>n (%)</b>     | <b>n (%)</b>     |
| <b>Sex</b>                                 |                  |                  |                  |                  |
| Male                                       | 1106 (58.5)      | 1542 (58.5)      | 1393 (63.0)      | 1267 (61.8)      |
| Female                                     | 785 (41.5)       | 1093 (41.5)      | 818 (37.0)       | 783 (38.2)       |
| <b>Age, years</b>                          |                  |                  |                  |                  |
| 50–59                                      | 260 (13.7)       | 412 (15.6)       | 368 (16.6)       | 361 (17.6)       |
| 60–69                                      | 537 (28.4)       | 762 (28.9)       | 708 (32.0)       | 636 (31.0)       |
| 70–79                                      | 745 (39.4)       | 950 (36.1)       | 688 (31.1)       | 631 (30.8)       |
| 80–89                                      | 349 (18.5)       | 511 (19.4)       | 447 (20.2)       | 422 (20.6)       |
| <b>Body mass index, * kg/m<sup>2</sup></b> |                  |                  |                  |                  |
| 15–19                                      | 87 (5.8)         | 150 (6.5)        | 142 (6.8)        | 132 (6.7)        |
| 20–24                                      | 539 (36.1)       | 718 (31.0)       | 626 (30.2)       | 559 (28.5)       |
| 25–29                                      | 581 (38.9)       | 919 (39.7)       | 761 (36.7)       | 705 (35.9)       |
| ≥30                                        | 286 (19.2)       | 527 (22.8)       | 546 (26.3)       | 567 (28.9)       |
| <b>Smoking status*</b>                     |                  |                  |                  |                  |
| Current smoker                             | 672 (39.5)       | 922 (35.4)       | 771 (35.0)       | 731 (35.7)       |
| Former smoker                              | 454 (26.7)       | 1095 (42.0)      | 1033 (46.8)      | 930 (45.4)       |
| Never smoked                               | 575 (33.8)       | 588 (22.6)       | 402 (18.2)       | 388 (18.9)       |
| <b>Alcohol use, units/week*</b>            |                  |                  |                  |                  |
| None                                       | 310 (20.7)       | 490 (21.7)       | 403 (20.7)       | 344 (18.7)       |
| 1–4                                        | 799 (53.3)       | 1113 (49.2)      | 913 (46.8)       | 895 (48.7)       |
| 5–9                                        | 243 (16.2)       | 401 (17.7)       | 385 (19.7)       | 329 (17.9)       |
| 10–15                                      | 95 (6.3)         | 159 (7.0)        | 143 (7.3)        | 177 (9.6)        |
| ≥20                                        | 53 (3.5)         | 98 (4.3)         | 107 (5.5)        | 94 (5.1)         |
| <b>Number of prescription medications</b>  |                  |                  |                  |                  |
| ≤1                                         | 773 (40.9)       | 910 (34.5)       | 711 (32.2)       | 624 (30.4)       |



| Characteristic       | Year 2000<br>(n=1891)<br>n (%) | Year 2005<br>(n=2635)<br>n (%) | Year 2010<br>(n=2211)<br>n (%) | Year 2014<br>(n=2050)<br>n (%) |
|----------------------|--------------------------------|--------------------------------|--------------------------------|--------------------------------|
| 2–4                  | 635 (33.6)                     | 746 (28.3)                     | 568 (25.7)                     | 520 (25.4)                     |
| ≥5                   | 483 (25.5)                     | 979 (37.2)                     | 932 (42.2)                     | 906 (44.2)                     |
| <b>Comorbidities</b> |                                |                                |                                |                                |
| MI                   | 261 (13.8)                     | 375 (14.2)                     | 281 (12.7)                     | 262 (12.8)                     |
| IHD without MI       | 483 (25.5)                     | 638 (24.1)                     | 470 (21.3)                     | 386 (18.8)                     |
| Heart failure        | 204 (10.8)                     | 243 (9.2)                      | 161 (7.3)                      | 178 (8.7)                      |
| Atrial fibrillation  | 175 (9.3)                      | 276 (10.5)                     | 297 (13.4)                     | 250 (12.2)                     |
| Ischaemic stroke     | 145 (7.7)                      | 182 (6.9)                      | 177 (8.0)                      | 184 (9.0)                      |
| TIA                  | 173 (9.1)                      | 190 (7.2)                      | 158 (7.1)                      | 147 (7.2)                      |
| Diabetes mellitus    | 383 (20.3)                     | 677 (25.7)                     | 593 (26.8)                     | 589 (28.7)                     |
| COPD                 | 193 (10.2)                     | 300 (11.4)                     | 318 (14.4)                     | 352 (17.2)                     |
| Asthma               | 237 (12.5)                     | 400 (15.2)                     | 422 (19.1)                     | 424 (20.7)                     |
| Cancer               | 199 (10.5)                     | 343 (13.0)                     | 349 (15.8)                     | 370 (18.0)                     |
| Depression           | 366 (19.4)                     | 602 (22.8)                     | 563 (25.5)                     | 582 (28.4)                     |
| Dementia             | 256 (13.5)                     | 439 (16.7)                     | 464 (21.0)                     | 495 (24.1)                     |

\*Excluding patients for whom this information was not known.

COPD, chronic obstructive pulmonary disease; IHD, ischaemic heart disease; MI, myocardial infarction; TIA, transient ischaemic attack.

1  
2  
3 **Figure legend**  
4

5 **Supplementary Figure S1** Time trends in the proportions of patients prescribed statin  
6 therapy in the 12 months before and 12 months after an incident diagnosis of PAD, with data  
7 for 2012–2014 restricted to primary care practices with at least 1 year of follow-up from the  
8 start date  
9

10  
11 Shaded area highlights the 2 months before and after the PAD diagnosis.

12  
13 PAD, peripheral artery disease.  
14  
15  
16  
17  
18  
19  
20  
21  
22  
23  
24  
25  
26  
27  
28  
29  
30  
31  
32  
33  
34  
35  
36  
37  
38  
39  
40  
41  
42  
43  
44  
45  
46  
47  
48  
49  
50  
51  
52  
53  
54  
55  
56  
57  
58  
59  
60

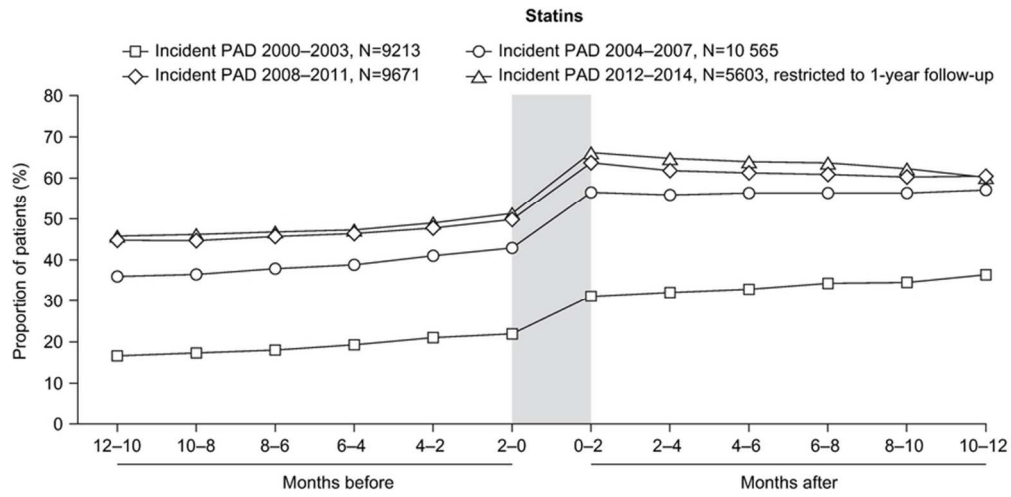

24  
25  
26  
27  
28

Supplementary Figure S1 Time trends in the proportions of patients prescribed statin therapy in the 12 months before and 12 months after an incident diagnosis of PAD, with data for 2012–2014 restricted to primary care practices with at least 1 year of follow-up from the start date. Shaded area highlights the 2 months before and after the PAD diagnosis.

78x38mm (300 x 300 DPI)

29  
30  
31  
32  
33  
34  
35  
36  
37  
38  
39  
40  
41  
42  
43  
44  
45  
46  
47  
48  
49  
50  
51  
52  
53  
54  
55  
56  
57  
58  
59  
60

## STROBE Statement—checklist of items that should be included in reports of observational studies

|                              | Item No | Recommendation                                                                                                                                                                                                                                                                                                                                                                                                                                                         | Page in manuscript |
|------------------------------|---------|------------------------------------------------------------------------------------------------------------------------------------------------------------------------------------------------------------------------------------------------------------------------------------------------------------------------------------------------------------------------------------------------------------------------------------------------------------------------|--------------------|
| <b>Title and abstract</b>    | 1       | (a) Indicate the study's design with a commonly used term in the title or the abstract                                                                                                                                                                                                                                                                                                                                                                                 | Pages 1 and 2      |
|                              |         | (b) Provide in the abstract an informative and balanced summary of what was done and what was found                                                                                                                                                                                                                                                                                                                                                                    | Page 2             |
| <b>Introduction</b>          |         |                                                                                                                                                                                                                                                                                                                                                                                                                                                                        |                    |
| Background/rationale         | 2       | Explain the scientific background and rationale for the investigation being reported                                                                                                                                                                                                                                                                                                                                                                                   | Page 5             |
| Objectives                   | 3       | State specific objectives, including any prespecified hypotheses                                                                                                                                                                                                                                                                                                                                                                                                       | Page 5             |
| <b>Methods</b>               |         |                                                                                                                                                                                                                                                                                                                                                                                                                                                                        |                    |
| Study design                 | 4       | Present key elements of study design early in the paper                                                                                                                                                                                                                                                                                                                                                                                                                | Pages 5–6          |
| Setting                      | 5       | Describe the setting, locations, and relevant dates, including periods of recruitment, exposure, follow-up, and data collection                                                                                                                                                                                                                                                                                                                                        | Pages 5–6          |
| Participants                 | 6       | (a) <i>Cohort study</i> —Give the eligibility criteria, and the sources and methods of selection of participants. Describe methods of follow-up<br><i>Case-control study</i> —Give the eligibility criteria, and the sources and methods of case ascertainment and control selection. Give the rationale for the choice of cases and controls<br><i>Cross-sectional study</i> —Give the eligibility criteria, and the sources and methods of selection of participants | Pages 5–7          |
|                              |         | (b) <i>Cohort study</i> —For matched studies, give matching criteria and number of exposed and unexposed<br><i>Case-control study</i> —For matched studies, give matching criteria and the number of controls per case                                                                                                                                                                                                                                                 | Not applicable     |
|                              |         |                                                                                                                                                                                                                                                                                                                                                                                                                                                                        |                    |
| Variables                    | 7       | Clearly define all outcomes, exposures, predictors, potential confounders, and effect modifiers. Give diagnostic criteria, if applicable                                                                                                                                                                                                                                                                                                                               | Pages 6–7          |
| Data sources/<br>measurement | 8*      | For each variable of interest, give sources of data and details of methods of assessment (measurement). Describe comparability of assessment methods if there is more than one group                                                                                                                                                                                                                                                                                   | Pages 6–7          |
| Bias                         | 9       | Describe any efforts to address potential sources of bias                                                                                                                                                                                                                                                                                                                                                                                                              | Not applicable     |
| Study size                   | 10      | Explain how the study size was arrived at                                                                                                                                                                                                                                                                                                                                                                                                                              | Page 6             |
| Quantitative<br>variables    | 11      | Explain how quantitative variables were handled in the analyses. If applicable, describe which groupings were chosen and why                                                                                                                                                                                                                                                                                                                                           | Page 7             |
| Statistical methods          | 12      | (a) Describe all statistical methods, including those used to control for confounding                                                                                                                                                                                                                                                                                                                                                                                  | Page 7             |
|                              |         | (b) Describe any methods used to examine subgroups and interactions                                                                                                                                                                                                                                                                                                                                                                                                    | Not applicable     |
|                              |         | (c) Explain how missing data were addressed                                                                                                                                                                                                                                                                                                                                                                                                                            | Not applicable     |
|                              |         | (d) <i>Cohort study</i> —If applicable, explain how loss to follow-up was addressed<br><i>Case-control study</i> —If applicable, explain how matching of cases and controls was addressed<br><i>Cross-sectional study</i> —If applicable, describe analytical methods taking account of sampling strategy                                                                                                                                                              | Not applicable     |
|                              |         | (e) Describe any sensitivity analyses                                                                                                                                                                                                                                                                                                                                                                                                                                  |                    |

| <b>Results</b>           |     |                                                                                                                                                                                                              |                                         |
|--------------------------|-----|--------------------------------------------------------------------------------------------------------------------------------------------------------------------------------------------------------------|-----------------------------------------|
| Participants             | 13* | (a) Report numbers of individuals at each stage of study—eg numbers potentially eligible, examined for eligibility, confirmed eligible, included in the study, completing follow-up, and analysed            | <i>Supplementary Table S3</i>           |
|                          |     | (b) Give reasons for non-participation at each stage                                                                                                                                                         | <i>Not applicable</i>                   |
|                          |     | (c) Consider use of a flow diagram                                                                                                                                                                           | <i>Not applicable</i>                   |
| Descriptive data         | 14* | (a) Give characteristics of study participants (eg demographic, clinical, social) and information on exposures and potential confounders                                                                     | <i>Supplementary Table S3</i>           |
|                          |     | (b) Indicate number of participants with missing data for each variable of interest                                                                                                                          | <i>Footnote, Supplementary Table S3</i> |
|                          |     | (c) <i>Cohort study</i> —Summarise follow-up time (eg, average and total amount)                                                                                                                             | <i>Methods, Results</i>                 |
| Outcome data             | 15* | <i>Cohort study</i> —Report numbers of outcome events or summary measures over time                                                                                                                          | <i>Pages 7–9, Figures, Tables</i>       |
|                          |     | <i>Case-control study</i> —Report numbers in each exposure category, or summary measures of exposure                                                                                                         | <i>Not applicable</i>                   |
|                          |     | <i>Cross-sectional study</i> —Report numbers of outcome events or summary measures                                                                                                                           | <i>Pages 7–9, Figures, Tables</i>       |
| Main results             | 16  | (a) Give unadjusted estimates and, if applicable, confounder-adjusted estimates and their precision (eg, 95% confidence interval). Make clear which confounders were adjusted for and why they were included | <i>Supplementary Table S2</i>           |
|                          |     | (b) Report category boundaries when continuous variables were categorized                                                                                                                                    | <i>Not applicable</i>                   |
|                          |     | (c) If relevant, consider translating estimates of relative risk into absolute risk for a meaningful time period                                                                                             | <i>Not applicable</i>                   |
| Other analyses           | 17  | Report other analyses done—eg analyses of subgroups and interactions, and sensitivity analyses                                                                                                               | <i>Not applicable</i>                   |
| <b>Discussion</b>        |     |                                                                                                                                                                                                              |                                         |
| Key results              | 18  | Summarise key results with reference to study objectives                                                                                                                                                     | <i>Pages 9–11</i>                       |
| Limitations              | 19  | Discuss limitations of the study, taking into account sources of potential bias or imprecision. Discuss both direction and magnitude of any potential bias                                                   | <i>Page 10</i>                          |
| Interpretation           | 20  | Give a cautious overall interpretation of results considering objectives, limitations, multiplicity of analyses, results from similar studies, and other relevant evidence                                   | <i>Pages 9–10</i>                       |
| Generalisability         | 21  | Discuss the generalisability (external validity) of the study results                                                                                                                                        | <i>Pages 9–10</i>                       |
| <b>Other information</b> |     |                                                                                                                                                                                                              |                                         |
| Funding                  | 22  | Give the source of funding and the role of the funders for the present study and, if applicable, for the original study on which the present article is based                                                | <i>Page 11</i>                          |

\*Give information separately for cases and controls in case-control studies and, if applicable, for exposed and unexposed groups in cohort and cross-sectional studies.

**Note:** An Explanation and Elaboration article discusses each checklist item and gives methodological background and published examples of transparent reporting. The STROBE checklist is best used in conjunction with this article (freely available on the Web sites of PLoS Medicine at <http://www.plosmedicine.org/>, Annals of Internal Medicine at

1  
2 <http://www.annals.org/>, and Epidemiology at <http://www.epidem.com/>). Information on the STROBE Initiative is  
3 available at [www.strobe-statement.org](http://www.strobe-statement.org).  
4  
5  
6  
7  
8  
9  
10  
11  
12  
13  
14  
15  
16  
17  
18  
19  
20  
21  
22  
23  
24  
25  
26  
27  
28  
29  
30  
31  
32  
33  
34  
35  
36  
37  
38  
39  
40  
41  
42  
43  
44  
45  
46  
47  
48  
49  
50  
51  
52  
53  
54  
55  
56  
57  
58  
59  
60

For peer review only

# BMJ Open

## Time trends in peripheral artery disease incidence, prevalence, and secondary preventive therapy: a cohort study in The Health Improvement Network in the UK

|                                 |                                                                                                                                                                                                                                                                                                                                                                                                     |
|---------------------------------|-----------------------------------------------------------------------------------------------------------------------------------------------------------------------------------------------------------------------------------------------------------------------------------------------------------------------------------------------------------------------------------------------------|
| Journal:                        | <i>BMJ Open</i>                                                                                                                                                                                                                                                                                                                                                                                     |
| Manuscript ID                   | bmjopen-2017-018184.R1                                                                                                                                                                                                                                                                                                                                                                              |
| Article Type:                   | Research                                                                                                                                                                                                                                                                                                                                                                                            |
| Date Submitted by the Author:   | 20-Sep-2017                                                                                                                                                                                                                                                                                                                                                                                         |
| Complete List of Authors:       | Cea-Soriano, Lucia; Spanish Center for Pharmacoepidemiology Research CEIFE, Fowkes, FGR; University of Edinburgh, Centre for Population Health Sciences<br>Johansson, Saga; AstraZeneca R&D, ; Gothenburg University, Institute of Medicine, Sahlgrenska Academy<br>Allum, Alaster; AstraZeneca R&D Cambridge<br>García Rodríguez, Luis; Spanish Centre for Pharmacoepidemiologic Research (CEIFE), |
| <b>Primary Subject Heading</b>: | Cardiovascular medicine                                                                                                                                                                                                                                                                                                                                                                             |
| Secondary Subject Heading:      | Cardiovascular medicine, Epidemiology, General practice / Family practice                                                                                                                                                                                                                                                                                                                           |
| Keywords:                       | EPIDEMIOLOGY, PRIMARY CARE, VASCULAR MEDICINE                                                                                                                                                                                                                                                                                                                                                       |
|                                 |                                                                                                                                                                                                                                                                                                                                                                                                     |

SCHOLARONE™  
Manuscripts

Only

1  
2  
3 **Time trends in peripheral artery disease incidence, prevalence,**  
4 **and secondary preventive therapy: a cohort study in The Health**  
5 **Improvement Network in the UK**  
6  
7  
8  
9

10  
11 Lucía Cea Soriano,<sup>1,2</sup> F Gerry R Fowkes,<sup>3</sup> Saga Johansson,<sup>4</sup> Alaster M Allum<sup>5</sup> and Luis A  
12 García Rodríguez<sup>1</sup>  
13

14  
15  
16  
17 <sup>1</sup>Pharmacoepidemiology, Spanish Centre for Pharmacoepidemiologic Research (CEIFE),  
18 Madrid, Spain  
19

20 <sup>2</sup>Department of Preventive Medicine and Public Health, Faculty of Medicine, Complutense  
21 University of Madrid, Madrid, Spain  
22

23 <sup>3</sup>Centre for Population Health Sciences, University of Edinburgh, Edinburgh, UK  
24

25 <sup>4</sup>AstraZeneca Gothenburg, Mölndal, Sweden  
26

27 <sup>5</sup>AstraZeneca Cambridge, Cambridge, UK  
28  
29

30 **Target journal:** *BMJ Open*  
31

32  
33 **Correspondence to:** Dr Lucía Cea Soriano, Centro Español de Investigación  
34

35 Farmacoepidemiológica (CEIFE), c/ Almirante 28-2º, Madrid 28004, Spain.  
36

37 E-mail: [luciaceife@gmail.com](mailto:luciaceife@gmail.com); phone: +34 (91) 531 3404; fax: +34 (91) 531 2871.  
38  
39  
40  
41  
42  
43  
44  
45  
46  
47  
48  
49  
50  
51  
52  
53  
54  
55  
56  
57  
58  
59  
60



## ABSTRACT

**Objectives:** To assess time trends in symptomatic peripheral artery disease (PAD) incidence and prevalence, and secondary preventive therapy.

**Design:** Cohort study using The Health Improvement Network (THIN).

**Setting:** UK primary care.

**Participants:** Individuals aged 50–89 years, annually between 2000 and 2014. Participants with symptomatic PAD were identified using Read codes.

**Outcome measures:** Incidence and prevalence of symptomatic PAD from 2000 to 2014, overall and by sex and age. Proportion of patients prescribed secondary preventive therapy with acetylsalicylic acid (ASA), clopidogrel, an angiotensin-converting enzyme (ACE) inhibitor, an angiotensin-receptor blocker (ARB), and/or a statin.

**Results:** The incidence of symptomatic PAD per 10 000 person-years decreased over time, from 38.6 (men: 51.0; women: 28.7) in 2000 to 17.3 (men: 23.1; women: 12.4) in 2014. The prevalence of symptomatic PAD decreased from 3.4% (men: 4.5%; women: 2.5%) in 2000 to 2.4% (men: 3.1%; women: 1.7%) in 2014. Incidence and prevalence decreases were observed in all age groups. The proportions of patients prescribed ASA monotherapy, clopidogrel monotherapy, and dual antiplatelet therapy in the 2 months after PAD diagnosis were 42.7%, 2.9%, and 2.5%, respectively, during 2000–2003, and 44.7%, 11.0%, and 5.2%, respectively, during 2012–2014. For ACE inhibitor/ARB therapy and statins, proportions in the 2 months after diagnosis were 30.2% and 31.2%, respectively, during 2000–2003, and 45.1% and 65.9%, respectively, during 2012–2014.

**Conclusion:** The incidence and prevalence of symptomatic PAD diagnosed in UK primary care are decreasing. A large proportion of the population with PAD in clinical practice does not receive guideline-recommended secondary prevention therapy.

Word count: 254 (limit 300)

**Strengths and limitations of this study**

- This is, to our knowledge, the largest study to date of time trends in PAD incidence and prevalence in the UK.
- Data are from electronic medical records in THIN, which has demonstrated validity for use in pharmacoepidemiological studies.
- Patients' anonymised medical records were reviewed manually to validate the selected diagnostic Read codes used to identify symptomatic PAD in a random sample.
- Potential limitations include possible changes over time in the source population and in how PAD is diagnosed in UK primary care, which would have affected the secular incidence and prevalence trend patterns.

## INTRODUCTION

Peripheral artery disease (PAD) causes leg pain or discomfort, most commonly occurring on exertion and resolving after rest (intermittent claudication), although some individuals have no obvious symptoms even when functional impairment is noticeable on testing.<sup>1</sup> Individuals with PAD are at increased risk of myocardial infarction (MI), ischaemic stroke, and death.<sup>2,3</sup> To reduce the risk of cardiovascular (CV) events, US and European guidelines recommend antiplatelet therapy and statins for all individuals with symptomatic PAD, and antihypertensive therapy for those with concomitant hypertension.<sup>4-7</sup> Angiotensin-converting enzyme (ACE) inhibitors may also reduce CV risk in symptomatic patients with PAD.<sup>4-7</sup>

The key risk factors for PAD are similar to those for other CV diseases, and include smoking, increasing age, diabetes mellitus, hypertension, and dyslipidaemia.<sup>8,9</sup> In recent years, the prevalence patterns of PAD risk factors have been changing substantially. Smoking prevalence is decreasing,<sup>10</sup> but there is an increase in the prevalence of diabetes mellitus. Advances in treatment and in the implementation of processes of care have resulted in individuals with coronary heart disease and cerebrovascular disease now surviving to older ages, which is when PAD tends to manifest itself.

Whereas rates of MI and ischaemic stroke are declining in most countries,<sup>11-13</sup> secular incidence and prevalence trends for PAD are less clear. A recent meta-analysis reported an increase in the prevalence of PAD (assessed using the ankle-brachial index [ABI]) in high-income countries from 2000 to 2010.<sup>9</sup> The analysis included data from 10 high-income countries including the USA and four European countries, but not the UK. Age-standardised prevalence data for symptomatic PAD from the US State of Health report show only minimal changes (<0.2%) from 1990 to 2010.<sup>14</sup> The aim of the current study was to determine secular trends in the incidence and prevalence of symptomatic PAD and of secondary preventive therapy in a large, representative primary care population in the UK.

## METHODS

### Study design and data source

This was a retrospective observational cohort study. Data were collected from The Health Improvement Network (THIN) database in the UK. THIN is an electronic medical research database that contains fully anonymised data on approximately 11 million patients collected from participating primary care practices in the UK.<sup>15</sup> The data in THIN are from all patients in participating practices and are recorded during each consultation with the primary care

1  
2  
3 physician/nurse, leaving no scope for selective participation or reporting. Patients included in  
4 THIN are representative of the UK general population.<sup>15</sup> The Read classification is used to  
5 code specific diagnoses,<sup>16</sup> and a drug dictionary based on data from the Gemscript  
6 classification is used to code drugs.<sup>17</sup>  
7  
8  
9

## 10 11 **Study cohorts**

### 12 *Source population*

13  
14 Patients aged 50–89 years were identified in THIN, annually between 1 January 2000 and  
15 31 December 2014. To be eligible for entry into the study, patients had to have been enrolled  
16 with their primary care physician for at least 2 years, to have visited their primary care  
17 physician at least once during that time, and to have a computerised prescription history for at  
18 least 2 years before study entry. These inclusion criteria helped to ensure that study  
19 participants were making use of healthcare services offered by their primary care practice and  
20 had historical information available.  
21  
22  
23  
24  
25  
26  
27

### 28 *Incident and prevalent symptomatic PAD*

29  
30 For each year during the follow up period, individuals with evidence of symptomatic PAD  
31 were identified by an automated database search using Read codes indicative of a  
32 symptomatic PAD diagnosis and/or related surgical procedures (supplementary table S1). For  
33 PAD incidence and secular trends, the date of the first entry of a PAD diagnosis in the THIN  
34 database was set as the index date. For prevalent PAD, each patient's start date was set as the  
35 date on which the study inclusion criteria (as listed above) were met.  
36  
37  
38  
39

40 The positive predictive value of the automated database search to identify patients  
41 with symptomatic PAD was assessed in a random validation sample of 400 of the identified  
42 patients. Patients' anonymised medical records, which included free-text comments from the  
43 primary care physicians, were reviewed manually. The diagnosis was confirmed in 97.0% of  
44 individuals (194/200) with incident PAD and in 99.0% of patients (198/200) with prevalent  
45 PAD, thereby confirming the positive predictive validity of the selected diagnostic Read  
46 codes used to identify symptomatic PAD.  
47  
48  
49  
50  
51  
52  
53  
54  
55  
56  
57  
58  
59  
60

## Statistical analyses

Annual incidence and prevalence were determined for the years 2000–2014. The annual incidence was calculated by dividing the number of individuals with newly diagnosed PAD in a particular year by the contribution of all study participants at risk (free of PAD) in that year. To calculate the annual prevalence, the sum of the number of individuals with a history of PAD plus the number of individuals with newly diagnosed PAD in a particular year was divided by the total population meeting the study eligibility criteria. The time trends in the proportions of patients prescribed therapy with acetylsalicylic acid (ASA), clopidogrel, an ACE inhibitor, an angiotensin-receptor blocker (ARB), and/or a statin in the 12 months before and 12 months after an incident PAD diagnosis were also assessed.

## Results

### Time trends in incidence and prevalence

Time trends in the incidence and prevalence of PAD from 2000 to 2014, overall and separately by sex and age group, are shown in figure 1. The incidence of PAD decreased steadily over time, from 38.55 per 10 000 person-years in 2000 to 17.33 per 10 000 person-years in 2014 (figure 1a). The incidence was higher in men than in women: in 2000 it was 50.96 per 10 000 person-years in men and 28.70 per 10 000 person-years in women, and in 2014 it was 23.05 per 10 000 person-years and 12.37 per 10 000 person-years, respectively. Decreases in incidence over time were observed in all age groups (figure 1b).

The incidence of PAD was higher in patients with a history of ischaemic heart disease at the study start date than in those with no such history (supplementary table S2). The incidence of PAD decreased over time at a similar rate in patients with a history of ischaemic heart disease (from 93.5 per 10 000 person-years in 2000 to 43.5 per 10 000 person-years in 2014) and those without a history of ischaemic heart disease (from 30.7 per 10 000 person-years in 2000 to 14.5 per 10 000 person-years in 2014).

The overall decrease in incidence of PAD from 2000 to 2014 was paralleled by a decrease in prevalence of the disease (figure 1c). The prevalence of PAD decreased from 3.42% (men: 4.53%; women: 2.52%) in 2000 to 2.37% (men: 3.12%; women: 1.70%) in 2014. Decreases in prevalence over time were observed in all age groups (figure 1d).

### Time trends in demographics and comorbidities

Noticeable changes over time among patients with incident PAD diagnosed in 2000, 2005, 2010, or 2014 included increases in the proportions of patients who were obese (body mass index  $\geq 30$  kg/m<sup>2</sup>) and individuals who had prescriptions for five or more medications (supplementary table S3). The proportion of current smokers decreased initially, from 39.5% among patients diagnosed in 2000 to 35.4% among those diagnosed in 2004, and then remained relatively constant thereafter. In the general population in THIN (i.e. the study source population), a decline in the proportion who were current smokers was observed over time, from 22.0% in the year 2000 to 14.8% in 2014 (note: these data exclude patients for whom information on smoking status was not known, which in 2000 and 2014 equalled 10.1% and 0.1%, respectively, among those diagnosed with incident PAD, and 14.0% and 0.3%, respectively, among the study source population).

Regarding comorbidity patterns, ischaemic heart disease prevalence without MI declined over time, with rates of 34.0%, 32.8%, 29.5%, and 26.4% in the years 2000, 2005, 2010, and 2014, respectively. However, increases in prevalence over time were observed for diagnoses of diabetes mellitus, chronic obstructive pulmonary disease, asthma, cancer, depression, and dementia. The age and sex distributions were similar over time.

### Time trends in treatment patterns

Time trends in treatment patterns in the 12 months before and 12 months after an incident diagnosis of PAD are shown in figure 2. Prescription rates increased at the time of the incident PAD diagnosis. ASA monotherapy was the most commonly prescribed antiplatelet therapy during the study period. Prescription rates for antiplatelet therapy in the 2 months after diagnosis in the years 2000–2003, 2004–2007, 2008–2011, and 2012–2014 were 42.7%, 47.4%, 48.4%, and 44.7% for ASA, 2.9%, 4.6%, 4.7%, and 11.0% for clopidogrel, and 2.5%, 3.2%, 4.6%, and 5.2% for dual antiplatelet therapy, respectively.

For ACE inhibitor or ARB therapy, prescription rates in the 2 months after diagnosis in the years 2000–2003, 2004–2007, 2008–2011, and 2012–2014 were 30.2%, 41.9%, 46.5%, and 45.1%, and for statin therapy they were 31.2%, 56.5%, 63.6%, and 65.9%, respectively. The proportion of patients with a prescription for an ACE inhibitor or ARB remained relatively similar before PAD diagnosis compared with after diagnosis in the earlier three study periods, but decreased after diagnosis in the most recent (2012–2014) study period. The proportion of patients with a statin prescription increased after an incident PAD diagnosis. In the most recent study period it decreased again in the months after the diagnosis, although

1  
2  
3 this trend was less pronounced when the analysis was restricted to practices with at least 1  
4 year of data collection after the start date in the 2012–2014 subgroup (supplementary figure  
5 S1), suggesting differences between practices in their end of year data collection rather than  
6 an actual decline in statin prescriptions.  
7  
8

9  
10 Although the proportion of patients with prescriptions for all three therapies (an  
11 antiplatelet agent, plus an ACE inhibitor or ARB, plus a statin) in the 12 months before and  
12 12 months after an incident diagnosis increased after 2000–2003 and also rose at PAD  
13 diagnosis, it remained below 30% at all times. Prescription rates for the three therapies  
14 combined in the 2 months after diagnosis in the years 2000–2003, 2004–2007, 2008–2011,  
15 and 2012–2014 were 9.7%, 22.6%, 27.3%, and 27.6%, respectively.  
16  
17  
18  
19  
20  
21

## 22 **DISCUSSION**

23  
24 The results of this large observational study, conducted in ‘real-life’ clinical practice, showed  
25 a steady decline over time in the incidence and prevalence of symptomatic PAD in UK  
26 primary care. The incidence in patients with ischaemic heart disease was approximately three  
27 times higher than in those without ischaemic heart disease, but both groups showed similar  
28 rates of decline. Ischaemic heart disease prevalence declined over time, potentially  
29 underlying the parallel secular trend in PAD prevalence, and suggesting general  
30 improvements in overall CV health over time in the UK.  
31  
32  
33  
34  
35

36 The decline in incidence of PAD between 2000 and 2014 was observed across all age  
37 groups except the 50–59-year group, in which the incidence remained largely similar over  
38 time. An important factor in the decrease in PAD incidence could be an increased uptake over  
39 time of secondary CV prevention strategies. In the current study, when assessing the 12  
40 months either side of PAD diagnosis, an increase over time was observed in the prescription  
41 rate for antiplatelet, ACE inhibitor, ARB and/or statin therapy, which may have delayed or  
42 prevented the onset of PAD in at-risk patients. Declining rates of smoking and increasing  
43 rates of diabetes in recent years in the UK may have influenced trends in the incidence of  
44 PAD but it should be recognized that there is likely to be a considerable lag effect with these  
45 risk factors affecting the development of chronic atherosclerotic diseases, including PAD,  
46 over many years of an individual's life. Thus, short term changes in risk factor prevalence  
47 from 2000 to 2014 in our study might have only a limited impact on incidence of PAD during  
48 that period.  
49  
50  
51  
52  
53  
54  
55  
56  
57  
58  
59  
60

1  
2  
3 Results of a recent meta-analysis indicated that the prevalence of PAD increased from  
4 2000 to 2010 in high-income countries.<sup>9</sup> Data on temporal trends in PAD prevalence suggest  
5 that any observed prevalence increases over time may be due to an ageing population, with  
6 age-standardised prevalence data for symptomatic PAD reporting only minimal changes over  
7 time.<sup>14</sup> The current study, which included only patients aged 50 years or older, observed a  
8 symptomatic PAD prevalence that ranged from 3.42% in 2000 to 2.37% in 2014. These rates  
9 are similar to those reported in other population-based studies in the USA and Europe that  
10 include a minimum age cut-off. In both the US Life Line Screening programme (participants  
11 aged  $\geq 40$  years; study years 2003–2008)<sup>18</sup> and the Spanish HERMEX study (participants  
12 aged  $\geq 50$  years; study years: 2007–2009),<sup>19</sup> PAD prevalence was 3.7%. Slightly higher  
13 prevalences of 7.6% and 5.8%, respectively, were reported in a Spanish primary healthcare  
14 study (participants aged  $\geq 50$  years; study years 2006–2008)<sup>20</sup> and the German Heinz Nixdorf  
15 Recall study (participants aged  $\geq 45$  years; study years 2000–2003).<sup>21</sup>

16  
17  
18  
19  
20  
21  
22  
23  
24  
25  
26  
27  
28  
29  
30  
31  
32  
33  
34  
35  
36  
37  
38  
39  
40  
41  
42  
43  
44  
45  
46  
47  
48  
49  
50  
51  
52  
53  
54  
55  
56  
57  
58  
59  
60  
There is a paucity of published data regarding the incidence of PAD.<sup>8</sup> Long-term  
results from a German study conducted in primary care (the 'getABI' study), which enrolled  
patients aged 65 years and older, found a PAD incidence of 203 per 10 000 person-years. In  
our study, a lower PAD incidence than in the German study was observed in the older age  
groups, ranging from approximately 30 per 10 000 person-years to 70 per 10 000 person-  
years (figure 1).

The reported incidence and prevalence across studies will depend on whether they are  
obtained using recorded diagnoses, as in the current study, or by assessing all study patients  
for PAD symptoms and signs (e.g. via the ABI). The latter approach will tend to result in  
higher observed incidence and prevalence. When assessing secular trends, it is essential to  
ensure that the methodology for identifying patients with PAD is similar across all time  
points, as was the case in the current study.

Risk factors for PAD should be carefully managed in primary care. Patients with PAD  
are at risk of progressing to critical limb ischaemia, irrespective of whether their PAD is  
symptomatic or asymptomatic. Patients who are at high risk for PAD need to be identified  
and screened, and adequate secondary prevention strategies implemented where appropriate.  
In the real world this is often not the case as is manifest by, for example, continuing high  
rates of smoking. There is a need to take an aggressive approach to dealing with factors to  
reduce the risk of PAD and of future serious outcomes.

Guidelines on the management of PAD were first published by the European Society  
of Cardiology (ESC) in August 2011<sup>5</sup> and by the UK National Institute of Health and Care



1  
2  
3 Excellence (NICE) in August 2012.<sup>22</sup> Both recommend antiplatelet therapy in all individuals  
4 with symptomatic PAD. Antiplatelet therapy for the prevention of vascular events has also  
5 been included in the NICE PAD management pathway. Additional recommendations from  
6 the ESC and NICE include smoking cessation, and management of diabetes mellitus,  
7 hypertension, and hyperlipidaemia.  
8  
9

10  
11 Although the proportion of patients with PAD prescribed antiplatelet therapy  
12 increased over time in the current study, more than one-third of patients were not prescribed  
13 antiplatelet therapy with ASA, clopidogrel, or combination therapy following an incident  
14 PAD diagnosis between 2012 and 2014. The proportion of patients with incident PAD who  
15 were prescribed a statin increased to approximately 66% at the time of PAD diagnosis during  
16 2012–2014. The proportion prescribed an ACE inhibitor or ARB decreased slightly after  
17 diagnosis in 2012–2014. Prescribing for secondary preventive therapies tended to be highest  
18 following PAD diagnosis.  
19  
20  
21  
22  
23

24 Our study has several key strengths. It is, to our knowledge, the largest study to date  
25 of time trends in PAD incidence and prevalence in the UK. Data are from electronic medical  
26 records in THIN. Patients included in THIN are representative of the UK general population  
27 in terms of age, sex, and geographical location.<sup>15</sup> THIN has demonstrated validity for use in  
28 pharmacoepidemiological studies.<sup>23</sup> Patients' anonymised medical records, which included  
29 free-text comments from the primary care physicians, were reviewed manually to validate the  
30 selected diagnostic Read codes used to identify symptomatic PAD in a random sample.  
31 Potential limitations include possible changes over time in the source population and in how  
32 PAD is diagnosed in UK primary care, which would have affected the secular incidence and  
33 prevalence trend patterns. PAD data were not assessed by race because patients' race is not  
34 systematically captured in THIN.  
35  
36  
37  
38  
39  
40  
41  
42

43 In conclusion, results from this study suggest that the incidence and prevalence of  
44 symptomatic PAD are decreasing in the UK. Although prescription rates have increased over  
45 time, a large proportion of individuals diagnosed with PAD in the primary care setting do not  
46 receive guideline-recommended secondary prevention therapy.  
47  
48  
49  
50

## 51 **Funding**

52 This work was supported by AstraZeneca. Medical writing support was provided by Dr Anja  
53 Becher of Oxford PharmaGenesis, Oxford, UK, and was funded by AstraZeneca.  
54  
55  
56  
57

## 58 **Competing interests**

1  
2  
3 All authors have completed the ICMJE uniform disclosure form at  
4 [www.icmje.org/coi\\_disclosure.pdf](http://www.icmje.org/coi_disclosure.pdf) and declare the following. L Cea Soriano and LA García  
5 Rodríguez are employees of CEIFE, which has received research funding from AstraZeneca  
6 Gothenburg, Mölndal, Sweden and Bayer Pharma AG, Berlin, Germany; LA García  
7 Rodríguez has also received honoraria for serving on scientific advisory boards for  
8 AstraZeneca and Bayer. FGR Fowkes has received honoraria for serving on scientific  
9 advisory boards for AstraZeneca, Bayer, and Merck. S Johansson is an employee of  
10 AstraZeneca Gothenburg, Mölndal, Sweden. AM Allum is an employee of AstraZeneca  
11 Cambridge, Cambridge, UK.  
12  
13  
14  
15  
16  
17  
18  
19

### 20 **Data sharing statement**

21 All relevant source data are shown in the manuscript and supplementary files.  
22  
23

### 24 **Exclusive licence**

25  
26 I, L. Cea Soriano, the corresponding author of this article contained within the original  
27 manuscript which includes any diagrams and photographs within and any related or stand  
28 alone film submitted (the “Contribution”) has the right to grant on behalf of all authors and  
29 does grant on behalf of all authors, a licence to the BMJ Publishing Group Ltd and its  
30 licencees, to permit this Contribution (if accepted) to be published in the BMJ and any other  
31 BMJ Group products and to exploit all subsidiary rights, as set out in our licence set out at:  
32 [http://www.bmj.com/about-bmj/resources-authors/forms-policies-and-checklists/copyright-](http://www.bmj.com/about-bmj/resources-authors/forms-policies-and-checklists/copyright-open-access-and-permission-reuse)  
33 [open-access-and-permission-reuse.](http://www.bmj.com/about-bmj/resources-authors/forms-policies-and-checklists/copyright-open-access-and-permission-reuse)  
34  
35  
36  
37  
38  
39  
40

### 41 **Author contributions**

42  
43 Lucía Cea Soriano: conception and design of the work, data collection, data analysis, data  
44 interpretation, critical revision of the article, approval of final draft. F Gerry R Fowkes: data  
45 interpretation, critical revision of the article, approval of final draft. Saga Johansson:  
46 conception and design of the work, data interpretation, critical revision of the article,  
47 approval of final draft. Alaster M Allum: conception and design of the work, data  
48 interpretation, critical revision of the article, approval of final draft. Luis A García Rodríguez:  
49 conception and design of the work, data collection, data analysis, data interpretation, critical  
50 revision of the article, approval of final draft.  
51  
52  
53  
54  
55  
56  
57  
58  
59  
60

## REFERENCES

1. Olin JW, Sealove BA. Peripheral artery disease: current insight into the disease and its diagnosis and management. *Mayo Clin Proc* 2010;85(7):678–92.
2. Pande RL, Perlstein TS, Beckman JA, Creager MA. Secondary prevention and mortality in peripheral artery disease: National Health and Nutrition Examination Study, 1999 to 2004. *Circulation* 2011;124(1):17–23.
3. Patel MR, Becker RC, Wojdyla DM, Emanuelsson H, Hiatt WR, Horrow J, et al. Cardiovascular events in acute coronary syndrome patients with peripheral arterial disease treated with ticagrelor compared with clopidogrel: data from the PLATO Trial. *Eur J Prev Cardiol* 2015;22(6):734–42.
4. Anderson JL, Halperin JL, Albert NM, Bozkurt B, Brindis RG, Curtis LH, et al. Management of patients with peripheral artery disease (compilation of 2005 and 2011 ACCF/AHA guideline recommendations): a report of the American College of Cardiology Foundation/American Heart Association Task Force on Practice Guidelines. *Circulation* 2013;127(13):1425–43.
5. Tendera M, Aboyans V, Bartelink ML, Baumgartner I, Clement D, Collet JP, et al. ESC guidelines on the diagnosis and treatment of peripheral artery diseases: document covering atherosclerotic disease of extracranial carotid and vertebral, mesenteric, renal, upper and lower extremity arteries: the Task Force on the Diagnosis and Treatment of Peripheral Artery Diseases of the European Society of Cardiology (ESC). *Eur Heart J* 2011;32(22):2851–906.
6. Norgren L, Hiatt WR, Dormandy JA, Nehler MR, Harris KA, Fowkes FG. Inter-society consensus for the management of peripheral arterial disease (TASC II). *J Vasc Surg* 2007;45 Suppl S:S5–67.
7. Rooke TW, Hirsch AT, Misra S, Sidawy AN, Beckman JA, Findeiss LK, et al. 2011 ACCF/AHA focused update of the guideline for the management of patients with peripheral artery disease (updating the 2005 guideline): a report of the American College of Cardiology Foundation/American Heart Association Task Force on Practice Guidelines. *J Am Coll Cardiol* 2011;58(19):2020–45.
8. Criqui MH, Aboyans V. Epidemiology of peripheral artery disease. *Circ Res* 2015;116(9):1509–26.
9. Fowkes FG, Rudan D, Rudan I, Aboyans V, Denenberg JO, McDermott MM, et al. Comparison of global estimates of prevalence and risk factors for peripheral artery

- 1  
2  
3 disease in 2000 and 2010: a systematic review and analysis. *Lancet*  
4 2013;382(9901):1329–40.  
5  
6 10. UK Office for National Statistics. Adult smoking habits in the UK. 2015. Available at:  
7 <https://www.ons.gov.uk/peoplepopulationandcommunity/healthandsocialcare/healthandlifeexpectancies/bulletins/adultsmokinghabitsingreatbritain/2015>. Accessed 28 Aug  
8 2017.  
9  
10 11. Mozaffarian D, Benjamin EJ, Go AS, Arnett DK, Blaha MJ, Cushman M, et al. Heart  
11 disease and stroke statistics – 2015 update: a report from the American Heart  
12 Association. *Circulation* 2015;131(4):e29–322.  
13  
14 12. Moran AE, Forouzanfar MH, Roth GA, Mensah GA, Ezzati M, Flaxman A, et al. The  
15 global burden of ischemic heart disease in 1990 and 2010: the Global Burden of  
16 Disease 2010 study. *Circulation* 2014;129(14):1493–501.  
17  
18 13. Nichols M, Townsend N, Scarborough P, Rayner M. Cardiovascular disease in Europe  
19 2014: epidemiological update. *Eur Heart J* 2014;35(42):2929.  
20  
21 14. Murray CJ, Atkinson C, Bhalla K, Birbeck G, Burstein R, Chou D, et al. The state of US  
22 health, 1990–2010: burden of diseases, injuries, and risk factors. *JAMA*  
23 2013;310(6):591–608.  
24  
25 15. Bourke A, Dattani H, Robinson M. Feasibility study and methodology to create a quality-  
26 evaluated database of primary care data. *Inform Prim Care* 2004;12(3):171–7.  
27  
28 16. Stuart-Buttle CD, Read JD, Sanderson HF, Sutton YM. A language of health in action:  
29 Read Codes, classifications and groupings. *Proc AMIA Annu Fall Symp* 1996:75–9.  
30  
31 17. In Practice Systems Ltd. Gemscript. (<http://www.inps.co.uk/>).  
32  
33 18. Savji N, Rockman CB, Skolnick AH, Guo Y, Adelman MA, Riles T, et al. Association  
34 between advanced age and vascular disease in different arterial territories: a  
35 population database of over 3.6 million subjects. *J Am Coll Cardiol*  
36 2013;61(16):1736–43.  
37  
38 19. Felix-Redondo FJ, Fernandez-Berges D, Grau M, Baena-Diez JM, Mostaza JM, Vila J.  
39 Prevalence and clinical characteristics of peripheral arterial disease in the study  
40 population Hermex. *Rev Esp Cardiol* 2012;65(8):726–33.  
41  
42 20. Alzamora MT, Fores R, Baena-Diez JM, Pera G, Toran P, Sorribes M, et al. The  
43 peripheral arterial disease study (PERART/ARTPER): prevalence and risk factors in  
44 the general population. *BMC Public Health* 2010;10(38):38.  
45  
46  
47  
48  
49  
50  
51  
52  
53  
54  
55  
56  
57  
58  
59  
60

- 1  
2  
3 21. Kroger K, Stang A, Kondratieva J, Moebus S, Beck E, Schmermund A, et al. Prevalence  
4 of peripheral arterial disease – results of the Heinz Nixdorf recall study. *Eur J*  
5 *Epidemiol* 2006;21(4):279–85.  
6  
7  
8 22. National Institute for Health and Care Excellence (NICE). Peripheral arterial disease:  
9 diagnosis and management (CG147). 2012. Available at:  
10 [https://www.nice.org.uk/guidance/cg147/resources/peripheral-arterial-disease-](https://www.nice.org.uk/guidance/cg147/resources/peripheral-arterial-disease-diagnosis-and-management-35109575873989)  
11 [diagnosis-and-management-35109575873989](https://www.nice.org.uk/guidance/cg147/resources/peripheral-arterial-disease-diagnosis-and-management-35109575873989). Accessed 3 Nov 2016.  
12  
13  
14 23. Lewis JD, Schinnar R, Bilker WB, Wang X, Strom BL. Validation studies of the health  
15 improvement network (THIN) database for pharmacoepidemiology research.  
16 *Pharmacoepidemiol Drug Saf* 2007;16(4):393–401.  
17  
18  
19  
20  
21  
22  
23  
24  
25  
26  
27  
28  
29  
30  
31  
32  
33  
34  
35  
36  
37  
38  
39  
40  
41  
42  
43  
44  
45  
46  
47  
48  
49  
50  
51  
52  
53  
54  
55  
56  
57  
58  
59  
60

## Figure legends

**Figure 1** Trends from 2000 to 2014 in peripheral artery disease: a) incidence, overall and according to sex; b) incidence according to age group; c) prevalence, overall and according to sex; d) prevalence according to age group.

**Figure 2** Time trends in the proportions of patients prescribed a) acetylsalicylic acid monotherapy, b) clopidogrel monotherapy, c) dual antiplatelet therapy, d) an angiotensin-converting enzyme inhibitor or an angiotensin-receptor blocker, e) a statin, or f) combined therapy with an antiplatelet, plus an angiotensin-converting enzyme inhibitor or an angiotensin-receptor blocker, plus a statin in the 12 months before and 12 months after an incident diagnosis of PAD.

Shaded area highlights the 2 months before and 2 months after the PAD diagnosis.  
PAD, peripheral artery disease.

**Supplementary Figure S1** Time trends in the proportions of patients prescribed statin therapy in the 12 months before and 12 months after an incident diagnosis of PAD, with data for 2012–2014 restricted to primary care practices with at least 1 year of follow-up from the start date

Shaded area highlights the 2 months before and after the PAD diagnosis.  
PAD, peripheral artery disease.



Figure 1 Trends from 2000 to 2014 in peripheral artery disease: a) incidence, overall and according to sex; b) incidence according to age group; c) prevalence, overall and according to sex; d) prevalence according to age group.

109x68mm (300 x 300 DPI)



Figure 2 Time trends in the proportions of patients prescribed a) acetylsalicylic acid monotherapy, b) clopidogrel monotherapy, c) dual antiplatelet therapy, d) an angiotensin-converting enzyme inhibitor or an angiotensin-receptor blocker, e) a statin, or f) combined therapy with an antiplatelet, plus an angiotensin-converting enzyme inhibitor or an angiotensin-receptor blocker, plus a statin in the 12 months before and 12 months after an incident diagnosis of PAD.

Shaded area highlights the 2 months before and 2 months after the PAD diagnosis.  
PAD, peripheral artery disease.

355x279mm (300 x 300 DPI)



# Time trends in peripheral artery disease incidence, prevalence, and secondary preventive therapy: a cohort study in The Health Improvement Network in the UK

Lucía Cea Soriano et al.

## Supplementary materials

**Supplementary Table S1** Read codes indicative of a symptomatic PAD diagnosis and/or related surgical procedures

| Read code | Descriptor                                      |
|-----------|-------------------------------------------------|
| G700.11   | Aorto-iliac disease                             |
| G702.00   | Extremity artery atheroma                       |
| G702z00   | Extremity artery atheroma NOS                   |
| G73..11   | Peripheral ischaemic vascular disease           |
| G73..12   | Ischaemia of legs                               |
| G73..13   | Peripheral ischaemia                            |
| G730100   | Raynaud's phenomenon                            |
| G731000   | Buerger's disease                               |
| G731100   | Presenile gangrene                              |
| G732.00   | Peripheral gangrene                             |
| G732000   | Gangrene of toe                                 |
| G732100   | Gangrene of foot                                |
| G733.00   | Ischaemic foot                                  |
| G734.00   | Peripheral arterial disease                     |
| G73y.00   | Other specified peripheral vascular disease     |
| G73y000   | Diabetic peripheral angiopathy                  |
| G73y100   | Peripheral angiopathic disease EC NOS           |
| G73yz00   | Other specified peripheral vascular disease NOS |
| G73z.00   | Peripheral vascular disease NOS                 |
| G73z000   | Intermittent claudication                       |
| G73z011   | Claudication                                    |
| G73z012   | Vascular claudication                           |

|    |         |                                                          |
|----|---------|----------------------------------------------------------|
| 1  |         |                                                          |
| 2  |         |                                                          |
| 3  | G73z100 | Spasm of peripheral artery                               |
| 4  |         |                                                          |
| 5  | G73zz00 | Peripheral vascular disease NOS                          |
| 6  |         |                                                          |
| 7  | G74..00 | Arterial embolism and thrombosis                         |
| 8  |         |                                                          |
| 9  | G74..11 | Arterial embolus and thrombosis                          |
| 10 |         |                                                          |
| 11 | G74..12 | Thrombosis – arterial                                    |
| 12 |         |                                                          |
| 13 | G74..13 | Arterial embolic and thrombotic occlusion                |
| 14 |         |                                                          |
| 15 | G740.12 | Aortoiliac obstruction                                   |
| 16 |         |                                                          |
| 17 | G740.13 | Leriche's syndrome                                       |
| 18 |         |                                                          |
| 19 | G742400 | Embolism and thrombosis of the femoral artery            |
| 20 |         |                                                          |
| 21 | G742500 | Embolism and thrombosis of the popliteal artery          |
| 22 |         |                                                          |
| 23 | G742600 | Embolism and thrombosis of the anterior tibial artery    |
| 24 |         |                                                          |
| 25 | G742700 | Embolism and thrombosis of the dorsalis pedis artery     |
| 26 |         |                                                          |
| 27 | G742800 | Embolism and thrombosis of the posterior tibial artery   |
| 28 |         |                                                          |
| 29 | G742900 | Embolism and thrombosis of a leg artery NOS              |
| 30 |         |                                                          |
| 31 | G742B00 | Post radiological embolism of lower limb artery          |
| 32 |         |                                                          |
| 33 | G742z00 | Peripheral arterial embolism and thrombosis NOS          |
| 34 |         |                                                          |
| 35 | G74y000 | Embolism and/or thrombosis of the common iliac artery    |
| 36 |         |                                                          |
| 37 | G74y100 | Embolism and/or thrombosis of the internal iliac artery  |
| 38 |         |                                                          |
| 39 | G74y200 | Embolism and/or thrombosis of the external iliac artery  |
| 40 |         |                                                          |
| 41 | G74y300 | Embolism and thrombosis of the iliac artery unspecified  |
| 42 |         |                                                          |
| 43 | G74z.00 | Arterial embolism and thrombosis NOS                     |
| 44 |         |                                                          |
| 45 | G761.00 | Stricture of artery                                      |
| 46 |         |                                                          |
| 47 | G765.00 | Necrosis of artery                                       |
| 48 |         |                                                          |
| 49 | G76A.00 | Arterial insufficiency                                   |
| 50 |         |                                                          |
| 51 | G76z.00 | Disorders of arteries and arterioles NOS                 |
| 52 |         |                                                          |
| 53 | G76z000 | Iliac artery occlusion                                   |
| 54 |         |                                                          |
| 55 | G76z100 | Femoral artery occlusion                                 |
| 56 |         |                                                          |
| 57 | G76z200 | Popliteal artery occlusion                               |
| 58 |         |                                                          |
| 59 | G7y..00 | Other specified arterial, arteriole or capillary disease |
| 60 |         |                                                          |
|    | G7z..00 | Arterial, arteriole and capillary diseases NOS           |
|    |         |                                                          |
|    | 14NB.00 | H/O: Peripheral vascular disease procedure               |
|    |         |                                                          |
|    | 2I16.00 | O/E - gangrene                                           |
|    |         |                                                          |
|    | R054.00 | [D]Gangrene                                              |

1  
2  
3 R054200 [D]Gangrene of toe in diabetic  
4  
5 R054300 [D]Widespread diabetic foot gangrene  
6  
7 8HIP.00 Referred for peripheral artery disease assessment  
8

9  
10 D, diagnosis; EC, elsewhere classified; H/O, history of; O/E, on examination; NOS, not  
11 otherwise specified; PAD, peripheral artery disease.  
12  
13  
14  
15  
16  
17  
18  
19  
20  
21  
22  
23  
24  
25  
26  
27  
28  
29  
30  
31  
32  
33  
34  
35  
36  
37  
38  
39  
40  
41  
42  
43  
44  
45  
46  
47  
48  
49  
50  
51  
52  
53  
54  
55  
56  
57  
58  
59  
60

For peer review only

**Supplementary Table S2** Trends from 2000 to 2014 in peripheral artery disease incidence, overall and according to history of IHD at baseline

| Year                | Overall          | IHD               | No IHD           |
|---------------------|------------------|-------------------|------------------|
| <b>2000</b>         |                  |                   |                  |
| Population, n       | 540 918          | 67 713            | 473 205          |
| Cases, n            | 1891             | 575               | 1316             |
| Person-years        | 490 553          | 61 463            | 429 089          |
| Incidence (95% CI)* | 38.5 (36.8–40.3) | 93.5 (86.2–101.5) | 30.7 (29.0–32.4) |
| <b>2005</b>         |                  |                   |                  |
| Population, n       | 1 008 929        | 121 781           | 887 148          |
| Cases, n            | 2635             | 789               | 1846             |
| Person-years        | 949 911          | 114 885           | 835 026          |
| Incidence (95% CI)* | 27.7 (26.7–28.8) | 68.7 (64.0–73.6)  | 22.1(21.1–23.1)  |
| <b>2010</b>         |                  |                   |                  |
| Population, n       | 1 219 901        | 132 092           | 1 087 809        |
| Cases, n            | 2211             | 592               | 1619             |
| Person-years        | 1 135 809        | 122 635           | 1 013 174        |
| Incidence (95% CI)* | 19.5 (18.7–20.3) | 48.3 (44.5–52.3)  | 16.0 (15.2–16.8) |
| <b>2014</b>         |                  |                   |                  |
| Population, n       | 1 306 192        | 126 031           | 1 180 161        |
| Cases, n            | 2050             | 499               | 1551             |
| Person-years        | 1 182 588        | 114 760           | 1 067 828        |
| Incidence (95% CI)* | 17.3 (16.7–18.1) | 43.5 (39.8–47.5)  | 14.5 (13.8–15.3) |

\*Incidence per 10 000 person–years.

CI, confidence interval; IHD, ischaemic heart disease.

**Supplementary Table S3** Characteristics of patients with incident peripheral artery disease diagnosed in the years 2000, 2005, 2010, and 2014

| Characteristic                            | Year 2000<br>(n=1891)<br>n (%) | Year 2005<br>(n=2635)<br>n (%) | Year 2010<br>(n=2211)<br>n (%) | Year 2014<br>(n=2050)<br>n (%) |
|-------------------------------------------|--------------------------------|--------------------------------|--------------------------------|--------------------------------|
| <b>Sex</b>                                |                                |                                |                                |                                |
| Male                                      | 1106 (58.5)                    | 1542 (58.5)                    | 1393 (63.0)                    | 1267 (61.8)                    |
| Female                                    | 785 (41.5)                     | 1093 (41.5)                    | 818 (37.0)                     | 783 (38.2)                     |
| <b>Age, years</b>                         |                                |                                |                                |                                |
| 50–59                                     | 260 (13.7)                     | 412 (15.6)                     | 368 (16.6)                     | 361 (17.6)                     |
| 60–69                                     | 537 (28.4)                     | 762 (28.9)                     | 708 (32.0)                     | 636 (31.0)                     |
| 70–79                                     | 745 (39.4)                     | 950 (36.1)                     | 688 (31.1)                     | 631 (30.8)                     |
| 80–89                                     | 349 (18.5)                     | 511 (19.4)                     | 447 (20.2)                     | 422 (20.6)                     |
| <b>Body mass index,* kg/m<sup>2</sup></b> |                                |                                |                                |                                |
| 15–19                                     | 87 (5.8)                       | 150 (6.5)                      | 142 (6.8)                      | 132 (6.7)                      |
| 20–24                                     | 539 (36.1)                     | 718 (31.0)                     | 626 (30.2)                     | 559 (28.5)                     |
| 25–29                                     | 581 (38.9)                     | 919 (39.7)                     | 761 (36.7)                     | 705 (35.9)                     |
| ≥30                                       | 286 (19.2)                     | 527 (22.8)                     | 546 (26.3)                     | 567 (28.9)                     |
| <b>Smoking status*</b>                    |                                |                                |                                |                                |
| Current smoker                            | 672 (39.5)                     | 922 (35.4)                     | 771 (35.0)                     | 731 (35.7)                     |
| Former smoker                             | 454 (26.7)                     | 1095 (42.0)                    | 1033 (46.8)                    | 930 (45.4)                     |
| Never smoked                              | 575 (33.8)                     | 588 (22.6)                     | 402 (18.2)                     | 388 (18.9)                     |
| <b>Alcohol use, units/week*</b>           |                                |                                |                                |                                |
| None                                      | 310 (20.7)                     | 490 (21.7)                     | 403 (20.7)                     | 344 (18.7)                     |
| 1–4                                       | 799 (53.3)                     | 1113 (49.2)                    | 913 (46.8)                     | 895 (48.7)                     |
| 5–9                                       | 243 (16.2)                     | 401 (17.7)                     | 385 (19.7)                     | 329 (17.9)                     |
| 10–15                                     | 95 (6.3)                       | 159 (7.0)                      | 143 (7.3)                      | 177 (9.6)                      |
| ≥20                                       | 53 (3.5)                       | 98 (4.3)                       | 107 (5.5)                      | 94 (5.1)                       |
| <b>Number of prescription medications</b> |                                |                                |                                |                                |
| ≤1                                        | 773 (40.9)                     | 910 (34.5)                     | 711 (32.2)                     | 624 (30.4)                     |

| Characteristic       | Year 2000<br>(n=1891)<br>n (%) | Year 2005<br>(n=2635)<br>n (%) | Year 2010<br>(n=2211)<br>n (%) | Year 2014<br>(n=2050)<br>n (%) |
|----------------------|--------------------------------|--------------------------------|--------------------------------|--------------------------------|
| 2–4                  | 635 (33.6)                     | 746 (28.3)                     | 568 (25.7)                     | 520 (25.4)                     |
| ≥5                   | 483 (25.5)                     | 979 (37.2)                     | 932 (42.2)                     | 906 (44.2)                     |
| <b>Comorbidities</b> |                                |                                |                                |                                |
| MI                   | 261 (13.8)                     | 375 (14.2)                     | 281 (12.7)                     | 262 (12.8)                     |
| IHD without MI       | 483 (25.5)                     | 638 (24.1)                     | 470 (21.3)                     | 386 (18.8)                     |
| Heart failure        | 204 (10.8)                     | 243 (9.2)                      | 161 (7.3)                      | 178 (8.7)                      |
| Atrial fibrillation  | 175 (9.3)                      | 276 (10.5)                     | 297 (13.4)                     | 250 (12.2)                     |
| Ischaemic stroke     | 145 (7.7)                      | 182 (6.9)                      | 177 (8.0)                      | 184 (9.0)                      |
| TIA                  | 173 (9.1)                      | 190 (7.2)                      | 158 (7.1)                      | 147 (7.2)                      |
| Hyperlipidaemia      | 204 (10.8)                     | 243 (9.2)                      | 161 (7.3)                      | 178 (8.7)                      |
| Diabetes mellitus    | 383 (20.3)                     | 677 (25.7)                     | 593 (26.8)                     | 589 (28.7)                     |
| COPD                 | 193 (10.2)                     | 300 (11.4)                     | 318 (14.4)                     | 352 (17.2)                     |
| Asthma               | 237 (12.5)                     | 400 (15.2)                     | 422 (19.1)                     | 424 (20.7)                     |
| Cancer               | 199 (10.5)                     | 343 (13.0)                     | 349 (15.8)                     | 370 (18.0)                     |
| Depression           | 366 (19.4)                     | 602 (22.8)                     | 563 (25.5)                     | 582 (28.4)                     |
| Dementia             | 256 (13.5)                     | 439 (16.7)                     | 464 (21.0)                     | 495 (24.1)                     |

\*Excluding patients for whom this information was not known (overall, data on smoking status and alcohol use were missing for 2.6% and 14.1% of patients, respectively).

COPD, chronic obstructive pulmonary disease; IHD, ischaemic heart disease; MI, myocardial infarction; TIA, transient ischaemic attack.

1  
2  
3 **Figure legend**  
4

5  
6 **Supplementary Figure S1** Time trends in the proportions of patients prescribed statin  
7 therapy in the 12 months before and 12 months after an incident diagnosis of PAD, with data  
8 for 2012–2014 restricted to primary care practices with at least 1 year of follow-up from the  
9 start date  
10  
11

12 Shaded area highlights the 2 months before and after the PAD diagnosis.

13 PAD, peripheral artery disease.  
14  
15  
16  
17  
18  
19  
20  
21  
22  
23  
24  
25  
26  
27  
28  
29  
30  
31  
32  
33  
34  
35  
36  
37  
38  
39  
40  
41  
42  
43  
44  
45  
46  
47  
48  
49  
50  
51  
52  
53  
54  
55  
56  
57  
58  
59  
60

For peer review only



Supplementary Figure S1 Time trends in the proportions of patients prescribed statin therapy in the 12 months before and 12 months after an incident diagnosis of PAD, with data for 2012–2014 restricted to primary care practices with at least 1 year of follow-up from the start date. Shaded area highlights the 2 months before and after the PAD diagnosis.

78x38mm (300 x 300 DPI)



## STROBE Statement—checklist of items that should be included in reports of observational studies

|                              | Item No | Recommendation                                                                                                                                                                                                                                                                                                                                                                                                                                                         | Page in manuscript |
|------------------------------|---------|------------------------------------------------------------------------------------------------------------------------------------------------------------------------------------------------------------------------------------------------------------------------------------------------------------------------------------------------------------------------------------------------------------------------------------------------------------------------|--------------------|
| <b>Title and abstract</b>    | 1       | (a) Indicate the study's design with a commonly used term in the title or the abstract                                                                                                                                                                                                                                                                                                                                                                                 | Pages 1 and 2      |
|                              |         | (b) Provide in the abstract an informative and balanced summary of what was done and what was found                                                                                                                                                                                                                                                                                                                                                                    | Page 2             |
| <b>Introduction</b>          |         |                                                                                                                                                                                                                                                                                                                                                                                                                                                                        |                    |
| Background/rationale         | 2       | Explain the scientific background and rationale for the investigation being reported                                                                                                                                                                                                                                                                                                                                                                                   | Page 4             |
| Objectives                   | 3       | State specific objectives, including any prespecified hypotheses                                                                                                                                                                                                                                                                                                                                                                                                       | Page 4             |
| <b>Methods</b>               |         |                                                                                                                                                                                                                                                                                                                                                                                                                                                                        |                    |
| Study design                 | 4       | Present key elements of study design early in the paper                                                                                                                                                                                                                                                                                                                                                                                                                | Pages 4–5          |
| Setting                      | 5       | Describe the setting, locations, and relevant dates, including periods of recruitment, exposure, follow-up, and data collection                                                                                                                                                                                                                                                                                                                                        | Pages 4–5          |
| Participants                 | 6       | (a) <i>Cohort study</i> —Give the eligibility criteria, and the sources and methods of selection of participants. Describe methods of follow-up<br><i>Case-control study</i> —Give the eligibility criteria, and the sources and methods of case ascertainment and control selection. Give the rationale for the choice of cases and controls<br><i>Cross-sectional study</i> —Give the eligibility criteria, and the sources and methods of selection of participants | Pages 4–6          |
|                              |         | (b) <i>Cohort study</i> —For matched studies, give matching criteria and number of exposed and unexposed<br><i>Case-control study</i> —For matched studies, give matching criteria and the number of controls per case                                                                                                                                                                                                                                                 | Not applicable     |
|                              |         |                                                                                                                                                                                                                                                                                                                                                                                                                                                                        |                    |
| Variables                    | 7       | Clearly define all outcomes, exposures, predictors, potential confounders, and effect modifiers. Give diagnostic criteria, if applicable                                                                                                                                                                                                                                                                                                                               | Pages 5–6          |
| Data sources/<br>measurement | 8*      | For each variable of interest, give sources of data and details of methods of assessment (measurement). Describe comparability of assessment methods if there is more than one group                                                                                                                                                                                                                                                                                   | Pages 5–6          |
| Bias                         | 9       | Describe any efforts to address potential sources of bias                                                                                                                                                                                                                                                                                                                                                                                                              | Not applicable     |
| Study size                   | 10      | Explain how the study size was arrived at                                                                                                                                                                                                                                                                                                                                                                                                                              | Page 5             |
| Quantitative<br>variables    | 11      | Explain how quantitative variables were handled in the analyses. If applicable, describe which groupings were chosen and why                                                                                                                                                                                                                                                                                                                                           | Page 6             |
| Statistical methods          | 12      | (a) Describe all statistical methods, including those used to control for confounding                                                                                                                                                                                                                                                                                                                                                                                  | Page 6             |
|                              |         | (b) Describe any methods used to examine subgroups and interactions                                                                                                                                                                                                                                                                                                                                                                                                    | Not applicable     |
|                              |         | (c) Explain how missing data were addressed                                                                                                                                                                                                                                                                                                                                                                                                                            | Not applicable     |
|                              |         | (d) <i>Cohort study</i> —If applicable, explain how loss to follow-up was addressed<br><i>Case-control study</i> —If applicable, explain how matching of cases and controls was addressed<br><i>Cross-sectional study</i> —If applicable, describe analytical methods taking account of sampling strategy                                                                                                                                                              | Not applicable     |
|                              |         | (e) Describe any sensitivity analyses                                                                                                                                                                                                                                                                                                                                                                                                                                  |                    |

| <b>Results</b>           |     |                                                                                                                                                                                                              |                                         |
|--------------------------|-----|--------------------------------------------------------------------------------------------------------------------------------------------------------------------------------------------------------------|-----------------------------------------|
| Participants             | 13* | (a) Report numbers of individuals at each stage of study—eg numbers potentially eligible, examined for eligibility, confirmed eligible, included in the study, completing follow-up, and analysed            | <i>Supplementary Table S3</i>           |
|                          |     | (b) Give reasons for non-participation at each stage                                                                                                                                                         | <i>Not applicable</i>                   |
|                          |     | (c) Consider use of a flow diagram                                                                                                                                                                           | <i>Not applicable</i>                   |
| Descriptive data         | 14* | (a) Give characteristics of study participants (eg demographic, clinical, social) and information on exposures and potential confounders                                                                     | <i>Supplementary Table S3</i>           |
|                          |     | (b) Indicate number of participants with missing data for each variable of interest                                                                                                                          | <i>Footnote, Supplementary Table S3</i> |
|                          |     | (c) <i>Cohort study</i> —Summarise follow-up time (eg, average and total amount)                                                                                                                             | <i>Methods, Results</i>                 |
| Outcome data             | 15* | <i>Cohort study</i> —Report numbers of outcome events or summary measures over time                                                                                                                          | <i>Pages 6–8, Figures, Tables</i>       |
|                          |     | <i>Case-control study</i> —Report numbers in each exposure category, or summary measures of exposure                                                                                                         | <i>Not applicable</i>                   |
|                          |     | <i>Cross-sectional study</i> —Report numbers of outcome events or summary measures                                                                                                                           | <i>Pages 6–8, Figures, Tables</i>       |
| Main results             | 16  | (a) Give unadjusted estimates and, if applicable, confounder-adjusted estimates and their precision (eg, 95% confidence interval). Make clear which confounders were adjusted for and why they were included | <i>Supplementary Table S2</i>           |
|                          |     | (b) Report category boundaries when continuous variables were categorized                                                                                                                                    | <i>Not applicable</i>                   |
|                          |     | (c) If relevant, consider translating estimates of relative risk into absolute risk for a meaningful time period                                                                                             | <i>Not applicable</i>                   |
| Other analyses           | 17  | Report other analyses done—eg analyses of subgroups and interactions, and sensitivity analyses                                                                                                               | <i>Not applicable</i>                   |
| <b>Discussion</b>        |     |                                                                                                                                                                                                              |                                         |
| Key results              | 18  | Summarise key results with reference to study objectives                                                                                                                                                     | <i>Pages 8–10</i>                       |
| Limitations              | 19  | Discuss limitations of the study, taking into account sources of potential bias or imprecision. Discuss both direction and magnitude of any potential bias                                                   | <i>Page 10</i>                          |
| Interpretation           | 20  | Give a cautious overall interpretation of results considering objectives, limitations, multiplicity of analyses, results from similar studies, and other relevant evidence                                   | <i>Pages 8–10</i>                       |
| Generalisability         | 21  | Discuss the generalisability (external validity) of the study results                                                                                                                                        | <i>Pages 8–10</i>                       |
| <b>Other information</b> |     |                                                                                                                                                                                                              |                                         |
| Funding                  | 22  | Give the source of funding and the role of the funders for the present study and, if applicable, for the original study on which the present article is based                                                | <i>Page 10–11</i>                       |

\*Give information separately for cases and controls in case-control studies and, if applicable, for exposed and unexposed groups in cohort and cross-sectional studies.

**Note:** An Explanation and Elaboration article discusses each checklist item and gives methodological background and published examples of transparent reporting. The STROBE checklist is best used in conjunction with this article (freely available on the Web sites of PLoS Medicine at <http://www.plosmedicine.org/>, Annals of Internal Medicine at

1  
2 <http://www.annals.org/>, and Epidemiology at <http://www.epidem.com/>). Information on the STROBE Initiative is  
3 available at [www.strobe-statement.org](http://www.strobe-statement.org).  
4  
5  
6  
7  
8  
9  
10  
11  
12  
13  
14  
15  
16  
17  
18  
19  
20  
21  
22  
23  
24  
25  
26  
27  
28  
29  
30  
31  
32  
33  
34  
35  
36  
37  
38  
39  
40  
41  
42  
43  
44  
45  
46  
47  
48  
49  
50  
51  
52  
53  
54  
55  
56  
57  
58  
59  
60

For peer review only
